# Supplementary material for: Limitations of conventional approaches to identify photochemically produced reactive intermediates involved in contaminant indirect photodegradation
Source: Royal Society of Chemistry journal article supplement (doi:10.1039/d3em00304c), 2023-01-01
Supplement: d3em00304c1.pdf [file d3em00304c1.pdf]

# Electronic Supplementary Information for: Limitations of conventional approaches to identify photochemically produced reactive intermediates involved in contaminant indirect photodegradation

*Reid P. Milstead<sup>1</sup>, Stephanie M. Berg<sup>1</sup>, Bella M. Kelly<sup>2</sup>, Christian D. Knellwolf<sup>2</sup>, Cooper J.  
Larson<sup>2</sup>, Kristine H. Wammer<sup>2</sup>, and Christina K. Remucal<sup>1,3\*</sup>*

<sup>1</sup>Environmental Chemistry and Technology Program  
University of Wisconsin – Madison  
Madison, Wisconsin 53706

<sup>2</sup>Department of Chemistry  
University of St. Thomas  
St. Paul, Minnesota 55105

<sup>3</sup>Department of Civil and Environmental Engineering  
University of Wisconsin – Madison  
Madison, Wisconsin 53706

**Contents (35 pages): Figures S1-S11 & Tables S1-S11**

\*Corresponding author address: 660 N. Park St., Madison, WI 53706;

email: [remucal@wisc.edu](mailto:remucal@wisc.edu); telephone: (608) 262-1820; fax: (608) 262-0454; Twitter: [@remucal](https://twitter.com/remucal)

## Table of Contents

|                                              |     |
|----------------------------------------------|-----|
| Section S1: Materials                        | S3  |
| Section S2: Sample collection                | S3  |
| Section S3: Bulk water chemistry             | S8  |
| Section S4: FT-ICR MS analysis               | S12 |
| Section S5: PPRI quantification              | S14 |
| Section S6: Contaminant kinetics experiments | S20 |
| Section S7: Quenching experiments            | S28 |
| Section S8: Linear regression analysis       | S30 |
| Section S9: References                       | S35 |

## Section S1: Materials

Hydrochloric acid (concentrated, ACS grade), acetonitrile (HPLC grade), methanol (HPLC grade), and potassium hydrogen phthalate (ACS grade) were purchased from Fisher Scientific. Monobasic potassium phosphate (reagent grade), dibasic potassium phosphate (reagent grade), sodium terephthalate (>98%), sodium hydroxide (reagent grade), carbamazepine (>98%), sulfadiazine (>99%), potassium sorbate (>99%), isopropanol (>99.5%), 1,4-diazobicyclo[2,2,2]octane (DABCO; >99%), boric acid (100%), disodium tetraborate decahydrate (borax; 100%), and histidine (98%) were purchased from Sigma Aldrich. Formic acid (88% v/v, ACS grade) was purchased from Aqua Solutions. *para*-Nitroanisole (>99%) and sodium hypochlorite were purchased from Acros Organics. Pyridine (>99%) and 2,2'-azino-bis(3-ethyl-6-benzothiazolinesulfonate) (ABTS; 98%) were purchased from Alfa Aesar. Furfuryl alcohol (>98%) was purchased from Tokyo Chemical Industry. Atorvastatin (>95%) was purchased from Matrix Scientific. Benzotriazole (98%) was purchased from TCI America. Ultrapure water (18.2 M $\Omega$  cm) was obtained from a Milli-Q water purification system. Sodium hypochlorite was standardized using a Shimadzu UV-visible spectrometer ( $\epsilon_{292} = 359 \text{ M}^{-1} \text{ cm}^{-1}$ ).<sup>1</sup> All other materials were used as received.

## Section S2: Sample collection

Water samples were collected from five different geographic areas (Northern Lakes, Mankato, St. Louis River, Yahara, and Twin Cities).<sup>2</sup> All of the wastewater samples were grouped into their own water category (i.e., 'wastewater'), while the natural waters from each area make up their own respective water categories. The lake samples were collected from near the middle of each body of water via boat (top 1 m of the water column). River and ditch samples were collected

by wading into each water. All samples were filtered through 0.45 µm nylon filters within 36 hours of sample collection and stored at 4 °C in the dark until analysis.

Seven natural water samples were collected from the North Temperate Lakes-Long Term Ecological Research (NTL-LTER) sites in northern Wisconsin and are labelled as the ‘Northern Lakes’ samples. These lakes include two dystrophic lakes (Crystal Bog and Trout Bog), one mesotrophic lake (Allequash Lake), and four oligotrophic lakes (Big Muskellunge Lake, Crystal Lake, Sparkling Lake, and Trout Lake).

Eight samples were collected near Mankato, Minnesota. The natural waters from this geographic area are labelled as the ‘Mankato’ samples. These samples include two agricultural ditches (Wammer Ditch, Olsen Ditch) and three river samples (Memories, Kiwannis, Seven-mile Creek). Memories and Kiwannis were in the Minnesota River and located upstream and downstream, respectively, of the Mankato Water Resource Recovery Facility (WRRF) samples. Three WRRF effluent samples were collected following secondary treatment. The WRRF pre-Cl sample was collected prior to disinfection, while the WRRF post-Cl sample was collected after chlorination and dechlorination with sodium bisulfite. The WRRF Reuse sample was chlorinated, but not dechlorinated.

A total of ten samples were collected in the Yahara watershed in Wisconsin. The natural waters are labelled as the ‘Yahara’ samples and include three physically connected lakes (Lake Mendota, Lake Wingra, Lake Kegonsa) and five river and stream samples (North Yahara, South Yahara, Confluence, Badfish upstream, Badfish downstream). Wastewater samples were collected from the Madison Metropolitan Sewerage District Nine Springs Wastewater Treatment Plant upstream (Nine Springs Pre-UV) and downstream (Nine Springs Post-UV) of UV disinfection.

Eleven samples were collected near the St. Louis River and Estuary in Duluth, MN and Superior, WI. The natural waters from this geographic area are labelled as the ‘St. Louis River’ samples and include seven river samples (Sand Creek, Meadowlands, River Inn, Munger Landing, East Detroit, Wisconsin Point, Blatnik Bridge). Four samples were collected from the Western Lake Superior Sanitary District (WLSSD) treatment plant. Samples were collected before (WLSSD Pre-Cl) and after (WLSSD post-Cl) disinfection by chlorine and dechlorination with sodium bisulfite during normal operations. Additional samples were collected before (WLSSD Influent) and after (WLSSD Effluent) chlorination/dechlorination when local paper mills were shut off.

Twelve samples were collected near the Twin Cities in Minnesota. The natural waters from this geographic area are labelled as the ‘Twin Cities’ samples and include five river samples (River Front Park, East River Parkway, Minnesota River, Metro Downstream, Eagle’s Point Downstream) and three oligotrophic lakes (Lake of the Isles, Vadnais Lake, Lake Phalen). Effluent was collected from the Metropolitan Wastewater Treatment Plant (Metro WWTP) after secondary treatment (pre-Cl) and after chlorination and dechlorination with sodium bisulfite (post-Cl), and from Eagles WWTP after secondary treatment (pre-UV) and after following disinfection with UV light (post-UV).

**Table S1.** Names, date of collection, coordinates, and brief descriptions for all samples analyzed in this study. Samples are organized into the water groupings used in analysis.

| Sample                | Date            | Coordinates         | Description      |
|-----------------------|-----------------|---------------------|------------------|
| <i>Northern Lakes</i> |                 |                     |                  |
| Crystal Bog (N1)      | August 29, 2018 | 46.00800, -89.60570 | Dystrophic lake  |
| Trout Bog (N2)        | August 29, 2018 | 46.04170, -89.68540 | Dystrophic lake  |
| Allequash Lake (N3)   | August 30, 2018 | 46.04810, -89.61240 | Mesotrophic lake |

|                               |                    |                       |                                                           |
|-------------------------------|--------------------|-----------------------|-----------------------------------------------------------|
| Big Muskellunge Lake (N4)     | August 30, 2018    | 46.02730, -89.59350   | Oligotrophic lake                                         |
| Crystal Lake (N5)             | August 30, 2018    | 45.9989, -89.60820    | Oligotrophic lake                                         |
| Sparkling Lake (N6)           | August 28, 2018    | 46.01580, -89.69450   | Oligotrophic lake                                         |
| Trout Lake (N7)               | August 30, 2018    | 46.07900, -89.64640   | Oligotrophic lake                                         |
| <b><i>Mankato</i></b>         |                    |                       |                                                           |
| Memories (M1)                 | June 24, 2019      | 44.15543, -94.04223   | Minnesota River; upstream of WRRF discharge               |
| Olsen Ditch (M2)              | June 25, 2019      | 44.11394, -94.26897   | Agricultural ditch                                        |
| Wammer Ditch (M3)             | June 25, 2019      | 44.13387, -94.30944   | Agricultural ditch                                        |
| Seven-mile Creek (M4)         | June 24, 2019      | 44.26217, -94.02657   | Tributary to Minnesota River                              |
| Kiwannis (M5)                 | June 24, 2019      | 44.200262, -94.01779  | Minnesota River, downstream of WRRF discharge             |
| <b><i>Yahara</i></b>          |                    |                       |                                                           |
| North Yahara (Y1)             | July 26, 2019      | 43.156742, -89.343755 | River that flows in Lake Mendota                          |
| Lake Mendota (Y2)             | July 25, 2019      | 43.11294, -89.42145   | Eutrophic lake                                            |
| Lake Wingra (Y3)              | October 9, 2019    | 43.053768, -89.419910 | Eutrophic lake                                            |
| Lake Kegonsa (Y4)             | October 9, 2019    | 42.963891, -89.254772 | Eutrophic lake                                            |
| South Yahara (Y5)             | July 26, 2019      | 42.94137, -89.20235   | Yahara River; downstream of Lake Kegonsa                  |
| Badfish Upstream (Y6)         | September 18, 2019 | 42.849748, -89.255665 | Badfish Creek; upstream of MMSD discharge                 |
| Badfish Downstream (Y7)       | September 18, 2019 | 42.849213, -89.255536 | Badfish Creek; downstream of MMSD discharge               |
| Confluence (Y8)               | July 26, 2019      | 42.82017, -89.16300   | Yahara River; downstream of confluence with Badfish Creek |
| <b><i>St. Louis River</i></b> |                    |                       |                                                           |
| Sand Creek (S1)               | September 3, 2020  | 47.185510, -92.853331 | Tributary to St. Louis River                              |
| Meadowlands (S2)              | September 3, 2020  | 47.068966, -92.775002 | St. Louis River                                           |

|                              |                   |                       |                                                                             |
|------------------------------|-------------------|-----------------------|-----------------------------------------------------------------------------|
| River Inn (S3)               | September 3, 2020 | 46.702892, -92.418854 | St. Louis River                                                             |
| Munger Landing (S4)          | September 3, 2020 | 46.700820, -92.207148 | St. Louis River                                                             |
| East Detroit (S5)            | September 3, 2020 | 46.651824, -92.203205 | St. Louis River                                                             |
| Blatnik Bridge (S6)          | September 2, 2020 | 46.751031, -92.102092 | St. Louis River Estuary                                                     |
| Wisconsin Point (S7)         | September 2, 2020 | 46.688643, -91.972299 | Shore of Lake Superior                                                      |
| <b><i>Twin Cities</i></b>    |                   |                       |                                                                             |
| River Front Park (T1)        | August 27, 2020   | 45.06769, -93.28108   | Minnesota River                                                             |
| East River Parkway (T2)      | August 27, 2020   | 44.9579, -93.21307    | Minnesota River                                                             |
| Minnesota River (T3)         | August 27, 2020   | 44.88484, -93.17476   | Minnesota River                                                             |
| Metro Downstream (T4)        | August 31, 2020   | 44.88195, -93.01738   | Minnesota River; downstream of Metro WWTP discharge                         |
| Eagles Point Downstream (T5) | August 31, 2020   | 44.74611, -92.85624   | Minnesota River; downstream of Eagles Point WWTP discharge                  |
| Lake of the Isles (T6)       | August 27, 2020   | 44.95174, -93.30727   | Oligotrophic lake                                                           |
| Vadnais Lake (T7)            | August 27, 2020   | 45.05128, -93.09446   | Oligotrophic lake                                                           |
| Lake Phalen (T8)             | August 27, 2020   | 44.98705, -93.05589   | Oligotrophic lake                                                           |
| <b><i>Wastewaters</i></b>    |                   |                       |                                                                             |
| WRRF pre-Cl (W1)             | June 24, 2019     | 44.18249, -94.00132   | Final effluent before chlorination                                          |
| WRRF Reuse (W2)              | June 24, 2019     | 44.18249, -94.00132   | Post chlorination/dechlorination, used to cool plant                        |
| WRRF post-Cl (W3)            | June 24, 2019     | 44.18249, -94.00132   | Final effluent chlorination/post chlorination                               |
| Nine Springs Pre-UV (W4)     | July 30, 2019     | 43.03967, -89.35752   | Effluent collected before UV disinfection                                   |
| Nine Springs Post-UV (W5)    | July 30, 2019     | 43.03967, -89.35752   | Effluent collected before UV disinfection                                   |
| WLSSD Influent (W6)          | May 6, 2020       | 46.761325, -92.124443 | WLSSD effluent collected during local paper mill shutdown, pre-chlorination |

|                            |                   |                       |                                                                                               |
|----------------------------|-------------------|-----------------------|-----------------------------------------------------------------------------------------------|
| WLSSD Effluent (W7)        | May 6, 2020       | 46.761325, -92.124443 | WLSSD effluent collected during local paper mill shutdown, post- chlorination/ dechlorination |
| WLSSD Pre-Cl (W8)          | September 3, 2020 | 46.761325, -92.124443 | WLSSD effluent pre-chlorination                                                               |
| WLSSD Post-Cl (W9)         | September 3, 2020 | 46.761325, -92.124443 | WLSSD effluent, post-chlorination/ dechlorination                                             |
| Metro WWTP Pre-Cl (W10)    | August 31, 2020   | 44.92612, -93.04823   | Effluent collected pre-chlorination                                                           |
| Metro WWTP Post-Cl (W11)   | August 31, 2020   | 44.92569, -93.04829   | Effluent collect post chlorination/dechlorination                                             |
| Eagles Point Pre-UV (W12)  | August 31, 2020   | 44.78602, -92.91925   | Effluent collected pre- UV disinfection                                                       |
| Eagles Point Post-UV (W13) | August 31, 2020   | 44.78602, -92.91925   | Effluent collected post UV chlorination                                                       |

### Section S3: Bulk water chemistry

**Table S2.** Sample pH and concentrations of dissolved organic carbon (DOC), dissolved inorganic carbon (DIC), iron (Fe), and nitrate ( $\text{NO}_3^-$ ). Nitrite was not detected in any water sample.

| Sample                    | pH        | [DOC]<br>(mg-C L <sup>-1</sup> ) | [DIC]<br>(mg-C L <sup>-1</sup> ) | [Fe]<br>(mg L <sup>-1</sup> ) | [NO <sub>3</sub> <sup>-</sup> ]<br>(mg L <sup>-1</sup> ) |
|---------------------------|-----------|----------------------------------|----------------------------------|-------------------------------|----------------------------------------------------------|
| <i>Northern Lakes</i>     |           |                                  |                                  |                               |                                                          |
| Crystal Bog (N1)          | 7.5 ± 0.1 | 11.0 ± 0.1                       | 4.0 ± 0.4                        | < 0.1                         | < 0.5                                                    |
| Trout Bog (N2)            | 7.5 ± 0.1 | 23.7 ± 0.4                       | 1.4 ± 0.1                        | 0.3 ± 0.1                     | < 0.5                                                    |
| Allequash Lake (N3)       | 8.4 ± 0.1 | 5.0 ± 0.1                        | 10.2 ± 0.1                       | 0.7 ± 0.2                     | < 0.5                                                    |
| Big Muskellunge Lake (N4) | 7.9 ± 0.1 | 4.2 ± 0.1                        | 6.0 ± 0.5                        | < 0.1                         | < 0.5                                                    |
| Crystal Lake (N5)         | 7.0 ± 0.1 | 2.6 ± 0.1                        | 1.4 ± 0.1                        | < 0.1                         | < 0.5                                                    |
| Sparkling Lake (N6)       | 8.1 ± 0.1 | 3.4 ± 0.1                        | 10.7 ± 0.1                       | < 0.1                         | < 0.5                                                    |
| Trout Lake (N7)           | 7.9 ± 0.1 | 3.0 ± 0.2                        | 10.7 ± 0.1                       | < 0.1                         | < 0.5                                                    |
| <i>Mankato</i>            |           |                                  |                                  |                               |                                                          |
| Memories (M1)             | 8.5 ± 0.1 | 4.6 ± 0.1                        | 63.4 ± 0.1                       | < 0.1                         | 18.0 ± 0.1                                               |
| Olsen Ditch (M2)          | 8.3 ± 0.1 | 1.8 ± 0.1                        | 77.2 ± 0.2                       | < 0.1                         | 44.4 ± 0.2                                               |
| Wammer Ditch (M3)         | 8.4 ± 0.1 | 3.3 ± 0.1                        | 68.4 ± 0.1                       | < 0.1                         | 32.3 ± 0.1                                               |
| Seven-mile Creek (M4)     | 8.5 ± 0.1 | 3.9 ± 0.1                        | 66.8 ± 0.1                       | < 0.1                         | 42.2 ± 0.1                                               |
| Kiwannis (M5)             | 8.4 ± 0.1 | 4.3 ± 0.1                        | 62.8 ± 0.2                       | < 0.1                         | 21.4 ± 0.1                                               |

| <i><b>Yahara</b></i>          |           |            |            |           |            |
|-------------------------------|-----------|------------|------------|-----------|------------|
| North Yahara (Y1)             | 8.4 ± 0.1 | 4.7 ± 0.1  | 62.6 ± 0.1 | < 0.1     | 11.3 ± 0.1 |
| Lake Mendota (M2)             | 8.7 ± 0.1 | 3.8 ± 0.1  | 37.4 ± 0.1 | < 0.1     | < 0.5      |
| Lake Wingra (M3)              | 8.5 ± 0.1 | 4.3 ± 0.1  | 41.2 ± 0.1 | < 0.1     | < 0.5      |
| Lake Kegonsa (M4)             | 8.4 ± 0.1 | 10.5 ± 0.1 | 41.0 ± 0.1 | < 0.1     | < 0.5      |
| South Yahara (M5)             | 8.4 ± 0.1 | 7.1 ± 0.1  | 46.8 ± 0.2 | < 0.1     | 0.8 ± 0.1  |
| Badfish Upstream (M6)         | 8.5 ± 0.1 | 2.4 ± 0.1  | 62.0 ± 0.2 | < 0.1     | 14.1 ± 0.1 |
| Badfish Downstream (M7)       | 8.4 ± 0.1 | 4.4 ± 0.6  | 68.4 ± 0.3 | < 0.1     | 72.5 ± 0.5 |
| Confluence (M8)               | 8.4 ± 0.1 | 4.1 ± 0.1  | 54.8 ± 0.3 | < 0.1     | 10.2 ± 0.1 |
| <i><b>St. Louis River</b></i> |           |            |            |           |            |
| Sand Creek (S1)               | 7.7 ± 0.1 | 69 ± 6     | 7.5 ± 0.1  | 5.9 ± 0.1 | < 0.5      |
| Meadowlands (S2)              | 8.1 ± 0.1 | 28.4 ± 0.8 | 30 ± 1     | 1.9 ± 0.1 | < 0.5      |
| River Inn (S3)                | 8.2 ± 0.1 | 24.8 ± 0.8 | 20.1 ± 0.1 | 1 ± 0.1   | < 0.5      |
| Munger Landing (S4)           | 8.2 ± 0.1 | 23.1 ± 0.5 | 18.2 ± 0.1 | 0.7 ± 0.1 | < 0.5      |
| East Detroit (S5)             | 8.2 ± 0.1 | 24.2 ± 0.1 | 18.4 ± 0.1 | 0.7 ± 0.1 | < 0.5      |
| Blatnik Bridge (S6)           | 8.4 ± 0.1 | 18 ± 5     | 20.8 ± 0.1 | 0.3 ± 0.1 | 1.1 ± 0.1  |
| Wisconsin Point (S7)          | 8.3 ± 0.1 | 8 ± 1      | 11.0 ± 0.1 | < 0.1     | 1.2 ± 0.1  |
| <i><b>Twin Cities</b></i>     |           |            |            |           |            |
| River Front Park (T1)         | 8.3 ± 0.1 | 31 ± 4     | 36.6 ± 0.2 | < 0.1     | 0.8 ± 0.1  |
| East River Parkway (T2)       | 8.4 ± 0.1 | 18 ± 9     | 35.7 ± 0.2 | < 0.1     | 0.5 ± 0.1  |
| Minnesota River (T3)          | 8.4 ± 0.1 | 5.2 ± 0.5  | 53.7 ± 0.2 | < 0.1     | 16.7 ± 0.1 |
| Metro Downstream (T4)         | 8.4 ± 0.1 | 9.0 ± 0.1  | 41.7 ± 0.2 | < 0.1     | 4.4 ± 0.1  |
| Eagles Point Downstream (T5)  | 8.4 ± 0.1 | 8.9 ± 0.4  | 38.4 ± 0.3 | < 0.1     | 5.4 ± 0.1  |
| Lake of the Isles (T6)        | 8.5 ± 0.1 | 8.7 ± 0.3  | 23.5 ± 0.1 | < 0.1     | < 0.5      |
| Vadnais Lake (T7)             | 8.5 ± 0.1 | 7.5 ± 0.4  | 28.1 ± 0.1 | < 0.1     | < 0.5      |

|                            |           |           |            |           |            |
|----------------------------|-----------|-----------|------------|-----------|------------|
| Lake Phalen (T8)           | 8.5 ± 0.1 | 6.7 ± 0.2 | 26.8 ± 0.1 | < 0.1     | < 0.5      |
| <i>Wastewaters</i>         |           |           |            |           |            |
| WRRF Pre-Cl (W1)           | 8.2 ± 0.1 | 4.8 ± 0.5 | 43.2 ± 0.3 | < 0.1     | 70.9 ± 0.5 |
| WRRF Reuse (W2)            | 8.3 ± 0.1 | 6.4 ± 1   | 44.4 ± 0.2 | < 0.1     | 90.2 ± 0.5 |
| WRRF Post-Cl (W3)          | 8.3 ± 0.1 | 5.0 ± 0.3 | 43.5 ± 0.2 | < 0.1     | 86.2 ± 0.5 |
| Nine Springs PreUV (W4)    | 8.4 ± 0.1 | 5.3 ± 0.1 | 67.8 ± 0.3 | < 0.1     | 76.4 ± 0.5 |
| Nine Springs PostUV (W5)   | 8.6 ± 0.1 | 5.9 ± 0.3 | 66.9 ± 0.4 | < 0.1     | 77.9 ± 0.5 |
| WLSSD Influent (W6)        | 7.3 ± 0.1 | 29 ± 2    | 65 ± 1     | 0.5 ± 0.1 | < 0.5      |
| WLSSD Effluent (W7)        | 8.1 ± 0.1 | 24 ± 2    | 72.0 ± 0.3 | 0.4 ± 0.1 | < 0.5      |
| WLSSD Pre-Cl (W8)          | 8.2 ± 0.1 | 53 ± 5    | 88.8 ± 0.6 | 0.9 ± 0.1 | 0.5 ± 0.3  |
| WLSSD Post-Cl (W9)         | 8.3 ± 0.1 | 43 ± 6    | 92.7 ± 0.4 | 1.0 ± 0.1 | < 0.5      |
| Metro WWTP Pre-Cl (W10)    | 8.3 ± 0.1 | 8.2 ± 0.8 | 53.1 ± 0.4 | < 0.1     | 6.8 ± 0.3  |
| Metro WWTP Post-Cl (W11)   | 8.3 ± 0.1 | 9 ± 1     | 46.8 ± 0.4 | < 0.1     | 63 ± 1     |
| Eagles Point Pre-UV (W12)  | 8.2 ± 0.1 | 7.5 ± 0.7 | 42.0 ± 0.3 | < 0.1     | 109 ± 1    |
| Eagles Point Post-UV (W13) | 8.2 ± 0.1 | 9 ± 2     | 42.6 ± 0.1 | < 0.1     | 111 ± 1    |

**Table S3.** Optical parameters and electron donating capacities of each of the samples.

| Sample                    | SUVA <sub>254</sub><br>(L mg-C <sup>-1</sup> m <sup>-1</sup> ) | E <sub>2</sub> :E <sub>3</sub> | HIX  | FI   | EDC<br>(mmol e <sup>-</sup> g-C <sup>-1</sup> ) |
|---------------------------|----------------------------------------------------------------|--------------------------------|------|------|-------------------------------------------------|
| <i>Northern Lakes</i>     |                                                                |                                |      |      |                                                 |
| Crystal Bog (N1)          | 2.16                                                           | 5.79                           | 1.17 | 1.43 | 2.34 ± 0.2                                      |
| Trout Bog (N2)            | 2.89                                                           | 5.79                           | 0.53 | 1.43 | 2.85 ± 0.7                                      |
| Allequash Lake (N3)       | 1.92                                                           | 7.56                           | 0.51 | 1.50 | 1.63 ± 0.2                                      |
| Big Muskellunge Lake (N4) | 0.47                                                           | 8.75                           | 0.31 | 1.53 | 0.26 ± 0.4                                      |
| Crystal Lake (N5)         | 0.25                                                           | 8.58                           | 0.73 | 1.54 | 0.66 ± 0.2                                      |
| Sparkling Lake (N6)       | 1.08                                                           | 9.69                           | 0.35 | 1.60 | 0.76 ± 0.06                                     |
| Trout Lake (N7)           | 0.81                                                           | 9.72                           | 0.47 | 1.51 | 0.71 ± 0.09                                     |
| <i>Mankato</i>            |                                                                |                                |      |      |                                                 |

|                               |      |       |      |      |             |
|-------------------------------|------|-------|------|------|-------------|
| Memories (M1)                 | 2.60 | 9.5   | 0.39 | 1.65 | 1.25 ± 0.2  |
| Olsen Ditch (M2)              | 4.00 | 10.77 | 0.49 | 1.69 | 0.96 ± 0.03 |
| Wammer Ditch (M3)             | 2.46 | 9.22  | 0.29 | 1.64 | 1.20 ± 0.2  |
| Seven-mile Creek (M4)         | 3.11 | 7.7   | 0.33 | 1.70 | 1.83 ± 0.3  |
| Kiwannis (M5)                 | 2.56 | 7.97  | 0.52 | 1.61 | 1.16 ± 0.2  |
| <b><i>Yahara</i></b>          |      |       |      |      |             |
| North Yahara (Y1)             | 2.94 | 7.5   | 0.45 | 1.60 | 2.04 ± 0.3  |
| Lake Mendota (Y2)             | 1.58 | 10.46 | 0.40 | 1.68 | 0.76 ± 0.1  |
| Lake Wingra (Y3)              | 2.03 | 8.24  | 0.74 | 1.61 | 1.54 ± 0.2  |
| Lake Kegonsa (Y4)             | 1.23 | 5.68  | 3.18 | 1.61 | 0.68 ± 0.3  |
| South Yahara (Y5)             | 1.35 | 7.1   | 0.21 | 1.64 | 0.78 ± 0.09 |
| Badfish Upstream (Y6)         | 3.45 | 7.44  | 0.38 | 1.72 | 2.44 ± 0.2  |
| Badfish Downstream (Y7)       | 2.34 | 5.98  | 0.54 | 2.00 | 4.36 ± 0.1  |
| Confluence (Y8)               | 2.39 | 6.6   | 0.29 | 1.70 | 1.19 ± 0.2  |
| <b><i>St. Louis River</i></b> |      |       |      |      |             |
| Sand Creek (S1)               | 3.31 | 5.35  | 1.98 | 1.50 | 1.55 ± 0.6  |
| Meadowlands (S2)              | 3.18 | 5.43  | 0.94 | 1.52 | 1.53 ± 0.8  |
| River Inn (S3)                | 3.18 | 6.54  | 0.89 | 1.52 | 1.72 ± 0.7  |
| Munger Landing (S4)           | 2.88 | 6.05  | 0.41 | 1.50 | 1.57 ± 0.7  |
| East Detroit (S5)             | 2.97 | 5.94  | 0.55 | 1.51 | 1.64 ± 0.6  |
| Blatnik Bridge (S6)           | 2.13 | 6.34  | 0.00 | 1.49 | 1.42 ± 0.3  |
| Wisconsin Point (S7)          | 0.20 | 6.52  | 0.48 | 1.46 | 0.24 ± 0.02 |
| <b><i>Twin Cities</i></b>     |      |       |      |      |             |
| River Front Park (T1)         | 0.82 | 7.54  | 0.41 | 1.53 | 0.50 ± 0.4  |
| East River Parkway (T2)       | 4.72 | 13.05 | 0.52 | 1.55 | 0.45 ± 0.3  |
| Minnesota River (T3)          | 2.28 | 7.12  | 0.41 | 1.60 | 1.03 ± 0.2  |
| Metro Downstream (T4)         | 2.33 | 7.22  | 0.37 | 1.56 | 1.23 ± 0.4  |
| Eagles Point Downstream (T5)  | 2.17 | 7.19  | 0.34 | 1.57 | 1.30 ± 0.4  |
| Lake of the Isles (T6)        | 0.97 | 9.75  | 0.28 | 1.64 | 0.67 ± 0.2  |
| Vadnais Lake (T7)             | 1.64 | 10.28 | 0.42 | 1.58 | 0.98 ± 0.3  |
| Lake Phalen (T8)              | 1.3  | 10.97 | 0.32 | 1.60 | 0.76 ± 0.3  |
| <b><i>Wastewaters</i></b>     |      |       |      |      |             |
| WRRF Pre-Cl (W1)              | 1.68 | 8.52  | 0.59 | 2.04 | 1.61 ± 0.3  |
| WRRF Reuse (W2)               | 1.01 | 12.48 | 0.55 | 1.92 | 0.51 ± 0.3  |
| WRRF Post-Cl (W3)             | 1.33 | 10.56 | 0.52 | 1.97 | 1.13 ± 0.4  |

|                            |      |      |      |      |            |
|----------------------------|------|------|------|------|------------|
| Nine Springs Pre-UV (W4)   | 2.11 | 6.08 | 0.34 | 2.04 | 4.01 ± 0.4 |
| Nine Springs Post-UV (W5)  | 1.72 | 5.96 | 0.57 | 2.03 | 3.21 ± 0.8 |
| WLSSD Influent (W6)        | 2.18 | 5.98 | 0.62 | 1.74 | 5.3 ± 1    |
| WLSSD Effluent (W7)        | 2.06 | 6.72 | 0.40 | 1.72 | 5.38 ± 0.7 |
| WLSSD Pre-Cl (W8)          | 1.86 | 6.93 | 0.22 | 1.56 | 2.1 ± 1    |
| WLSSD Post-Cl (W9)         | 2.34 | 7.06 | 0.52 | 1.54 | 2.43 ± 0.8 |
| Metro WWTP Pre-Cl (W10)    | 1.51 | 5.84 | 0.41 | 1.98 | 2.01 ± 0.2 |
| Metro WWTP Post-Cl (W11)   | 1.51 | 5.84 | 0.27 | 1.98 | 1.69 ± 0.2 |
| Eagles Point Pre-UV (W12)  | 1.46 | 5.07 | 0.37 | 2.08 | 2.42 ± 0.3 |
| Eagles Point Post-UV (W13) | 2.17 | 7.19 | 0.48 | 2.09 | 2.0 ± 0.3  |

#### Section S4: FT-ICR MS analysis

**Table S4.** Total number of formula matches, average weighted H:C ( $H:C_w$ ), average weighted O:C ( $O:C_w$ ), and average weighted double bond equivalents ( $DBE_w$ ) for all samples.

| Sample                    | Total # formulas | H:C <sub>w</sub> | O:C <sub>w</sub> | DBE <sub>w</sub> |
|---------------------------|------------------|------------------|------------------|------------------|
| <i>Northern Lakes</i>     |                  |                  |                  |                  |
| Crystal Bog (N1)          | 2691             | 1.11             | 0.53             | 9.67             |
| Trout Bog (N2)            | 2172             | 1.09             | 0.55             | 9.93             |
| Allequash Lake (N3)       | 3300             | 1.15             | 0.52             | 9.19             |
| Big Muskellunge Lake (N4) | 3716             | 1.28             | 0.51             | 7.78             |
| Crystal Lake (N5)         | 3231             | 1.36             | 0.49             | 6.65             |
| Sparkling Lake (N6)       | 3960             | 1.23             | 0.49             | 8.41             |
| Trout Lake (N7)           | 3555             | 1.23             | 0.51             | 8.42             |
| <i>Mankato</i>            |                  |                  |                  |                  |
| Memories (M1)             | 4267             | 1.16             | 0.52             | 9.49             |
| Olsen Ditch (M2)          | 3300             | 1.15             | 0.51             | 9.79             |
| Wammer Ditch (M3)         | 4290             | 1.17             | 0.50             | 9.30             |
| Seven-mile Creek (M4)     | 4176             | 1.15             | 0.51             | 9.63             |
| Kiwannis (M5)             | 4217             | 1.17             | 0.51             | 9.42             |
| <i>Yahara</i>             |                  |                  |                  |                  |
| North Yahara (Y1)         | 4608             | 1.12             | 0.51             | 9.55             |

|                               |      |      |      |      |
|-------------------------------|------|------|------|------|
| Lake Mendota (Y2)             | 4970 | 1.22 | 0.50 | 8.66 |
| Lake Wingra (Y3)              | 4988 | 1.20 | 0.49 | 8.76 |
| Lake Kegonsa (Y4)             | 5045 | 1.20 | 0.50 | 8.92 |
| South Yahara (Y5)             | 5169 | 1.20 | 0.50 | 8.84 |
| Badfish Upstream (Y6)         | 4852 | 1.20 | 0.48 | 9.02 |
| Badfish Downstream (Y7)       | 5322 | 1.26 | 0.47 | 8.22 |
| Confluence (Y8)               | 4955 | 1.18 | 0.51 | 9.03 |
| <b><i>St. Louis River</i></b> |      |      |      |      |
| Sand Creek (S1)               | 3057 | 1.28 | 0.41 | 7.81 |
| Meadowlands (S2)              | 3047 | 1.33 | 0.38 | 7.19 |
| River Inn (S3)                | 3266 | 1.26 | 0.43 | 8.05 |
| Munger Landing (S4)           | 3124 | 1.29 | 0.40 | 7.68 |
| East Detroit (S5)             | 3029 | 1.32 | 0.39 | 7.39 |
| Blatnik Bridge (S6)           | 3338 | 1.35 | 0.37 | 6.96 |
| Wisconsin Point (S7)          | 2150 | 1.60 | 0.20 | 4.52 |
| <b><i>Twin Cities</i></b>     |      |      |      |      |
| River Front Park (T1)         | 3601 | 1.34 | 0.38 | 7.09 |
| East River Parkway (T2)       | 3822 | 1.43 | 0.30 | 6.22 |
| Minnesota River (T3)          | 3477 | 1.49 | 0.30 | 5.55 |
| Metro Downstream (T4)         | 4028 | 1.41 | 0.33 | 6.48 |
| Eagles Point Downstream (T5)  | 4055 | 1.47 | 0.28 | 5.83 |
| Lake of the Isles (T6)        | 4422 | 1.51 | 0.28 | 5.47 |
| Vadnais Lake (T7)             | 4038 | 1.45 | 0.31 | 6.07 |
| Lake Phalen (T8)              | 4419 | 1.46 | 0.30 | 5.89 |
| <b><i>Wastewaters</i></b>     |      |      |      |      |
| WRRF Pre-C1 (W1)              | 4772 | 1.27 | 0.48 | 8.10 |
| WRRF Reuse (W2)               | 4336 | 1.29 | 0.48 | 7.75 |
| WRRF Post-C1 (W3)             | 4689 | 1.28 | 0.49 | 7.97 |
| Nine Springs Pre-UV (W4)      | 5155 | 1.34 | 0.51 | 7.26 |
| Nine Springs Post-UV (W5)     | 5047 | 1.35 | 0.49 | 7.15 |
| WLSSD Influent (W6)           | 3245 | 1.40 | 0.40 | 6.66 |
| WLSSD Effluent (W7)           | 4272 | 1.43 | 0.39 | 6.25 |
| WLSSD Pre-C1 (W8)             | 3998 | 1.27 | 0.46 | 7.60 |
| WLSSD<br>Post-C1 (W9)         | 3878 | 1.33 | 0.43 | 7.09 |
| Metro WWTP Pre-C1 (W10)       | 4842 | 1.51 | 0.29 | 5.32 |
| Metro WWTP Post-C1 (W11)      | 4466 | 1.48 | 0.33 | 5.52 |
| Eagles Point Pre-UV (W12)     | 4451 | 1.55 | 0.28 | 4.93 |
| Eagles Point Post-UV (W13)    | 4417 | 1.54 | 0.28 | 4.96 |

## Section S5: PPRI quantification

**Probe compound quantification.** The probe compounds furfuryl alcohol (FFA), terephthalic acid (TPA), and 2,4,6-trimethylphenol (TMP) were used in separate experiments to quantify the formation of singlet oxygen ( $^1\text{O}_2$ ), hydroxyl radical ( $^{\bullet}\text{OH}$ ), and triplet state DOM ( $^3\text{DOM}$ ), respectively, in all water samples. Sample irradiation times varied to allow for four to five sampling points to be collected. For TPA, only the initial time points were used for calculations, as this probe quantifies the rate of formation of hydroxy-terephthalic acid (hTPA) instead of the first-order degradation of the probe compounds. At least three of the time points were included in the TPA measurements. Both FFA and TMP concentrations exhibited pseudo-first-order degradation kinetics over the experimental time frame. All reactions occurred at room temperature.

The formation of hTPA and the degradation of FFA, TMP, and the *p*-nitroanisole (PNA) actinometer were quantified using high-performance liquid chromatography (HPLC; equipped with 1260 diode array detector and a 1260 fluorescence detector).

**Table S5.** HPLC methods used to quantify the degradation of FFA, TMP, PNA, and the formation of hTPA.

| <b>Furfuryl alcohol (FFA)</b>      |                                                                       |
|------------------------------------|-----------------------------------------------------------------------|
| <b>Pump settings</b>               | 0.6 mL/min flow rate<br>Isocratic: 90% 0.1% v/v formic acid, 10% ACN  |
| <b>Column</b>                      | Agilent Poroshell 120 EC-C18 (3.0 x 50 mm) w/ guard column (3.0 mm)   |
| <b>Elution time</b>                | 1.7 min                                                               |
| <b>Wavelength</b>                  | 217 nm                                                                |
| <b>2,4,6-Trimethylphenol (TMP)</b> |                                                                       |
| <b>Pump settings</b>               | 0.75 mL/min flow rate<br>Isocratic: 50% 0.1% v/v formic acid, 50% ACN |
| <b>Column</b>                      | Agilent Poroshell 120 EC-C18 (3.0 x 50 mm) w/ guard column (3.0 mm)   |
| <b>Elution time</b>                | 0.8 min                                                               |
| <b>Wavelength</b>                  | excitation: 315 nm, emission: 425 nm                                  |
| <b><i>p</i>-Nitroanisole (PNA)</b> |                                                                       |
| <b>Pump settings</b>               | 0.6 mL/min flow rate<br>Isocratic: 50% 0.1% v/v formic acid, 50% ACN  |
| <b>Column</b>                      | Agilent Poroshell 120 EC-C18 (3.0 x 50 mm) w/ guard column (3.0 mm)   |

|                                         |                                                                        |
|-----------------------------------------|------------------------------------------------------------------------|
| <b>Elution time</b>                     | 1.5 min                                                                |
| <b>Wavelength</b>                       | 314 nm                                                                 |
| <b>hydroxy-terephthalic acid (hTPA)</b> |                                                                        |
| <b>Pump settings</b>                    | 1.5 mL/min flow rate<br>Isocratic: 60% 0.1% phosphoric acid, 40% ACN   |
| <b>Column</b>                           | Agilent Poroshell 120 Bonus RP (3.0 x 100 mm) w/ guard column (3.0 mm) |
| <b>Wavelength</b>                       | excitation: 250 nm, emission: 410 nm                                   |

**Steady-state concentrations.** Steady-state concentrations of  $^3\text{DOM}$  were calculated as described previously:<sup>3</sup>

$$[^3\text{DOM}]_{ss} = \frac{\Delta[\text{TMP}]/\Delta t}{k_{\text{TMP}}} \quad (\text{S1})$$

where  $k_{obs}$  is the pseudo-first order observed rate constant of TMP degradation and  $k_{\text{TMP}}$  is the second order rate constant for the reaction between  $^3\text{DOM}$  and TMP ( $2.6 \times 10^{-9} \text{ M}^{-1} \text{ s}^{-1}$ ).<sup>3</sup> Importantly, these experiments were conducted at a normalized [DOC] value of  $5 \text{ mg-C L}^{-1}$ . Steady-state concentrations of  $^1\text{O}_2$  were determined based on the observed loss rate of FFA:<sup>4</sup>

$$[^1\text{O}_2]_{ss} = \frac{\Delta[\text{FFA}]/\Delta t}{k_{\text{FFA}}} \quad (\text{S2})$$

where  $k_{\text{FFA}}$  is the rate constant for the reaction between  $^1\text{O}_2$  and FFA ( $1.00 \times 10^8 \text{ M}^{-1} \text{ s}^{-1}$ ).<sup>5</sup> Steady-state concentrations for hydroxyl radical ( $[\cdot\text{OH}]_{ss}$ ) were determined as:

$$[\cdot\text{OH}]_{ss} = \frac{\Delta[\text{hTPA}]/\Delta t}{k_{\text{TPA}}} \quad (\text{S3})$$

where  $k_{\text{TPA}}$  is the rate constant for the reaction between hydroxyl radical and TPA ( $4.4 \times 10^9 \text{ M}^{-1} \text{ s}^{-1}$ ).<sup>6</sup>

**Light intensity.** The light intensity of irradiation experiments was determined using a calculated screening factor ( $S$ ) and the rate of light absorbance ( $R_a$ ). The screening factor at each wavelength was calculated using decadal absorbance ( $\alpha_\lambda$ ,  $\text{cm}^{-1}$ ) and experimental pathlength ( $l$ , cm):

$$S_{\lambda} = \frac{1-10^{-l \times \alpha_{\lambda}}}{2.303 \times l \times \alpha_{\lambda}} \quad (S4)$$

The rate of light absorbance of the PNA actinometer ( $R_{a, PNA}$ ) was calculated using the pseudo-first-order loss rate of PNA ( $k_{obs, PNA}$ , s<sup>-1</sup>), the initial concentration of PNA ( $[PNA]_{t=0}$ , M), and the quantum yield of the reaction between PNA and pyridine ( $\Phi_{PNA}$ ):<sup>7</sup>

$$\sum_{\lambda} R_{a, PNA, \lambda} = \frac{k_{obs, PNA} [PNA]_{t=0}}{\Phi_{PNA}} \quad (S5)$$

$R_a$  values were integrated from 315 – 415 nm. The photon flux was ( $I$ , E cm<sup>-2</sup> s<sup>-1</sup>) was then calculated as:

$$I = \sum_{\lambda} \frac{R_{a, PNA, \lambda}}{2.303 \times S_{\lambda} \times \epsilon_{\lambda} \times l} \quad (S6)$$

where  $\epsilon_{\lambda}$  is the molar absorptivity of PNA at a given wavelength.

**Quantum yields of PPRI.** The quantum yield of singlet oxygen formation ( $\Phi_{1O_2}$ ) was calculated as described previously<sup>4</sup> using  $\Phi_{PNA}$ ,  $[PNA]_{t=0}$ ,  $k_{obs, PNA}$ , the rate constant for quenching of <sup>1</sup>O<sub>2</sub> by water ( $k_d$ , 2.4 x 10<sup>5</sup> s<sup>-1</sup>),<sup>3,5</sup>  $k_{FFA}$ , the rate of light absorption of both PNA ( $R_{a, PNA}$ ) and FFA ( $R_{a, FFA}$ ), and the observed rate constant of degradation of FFA ( $k_{obs, FFA}$ ):

$$\Phi_{1O_2} = \frac{\Phi_{PNA}}{[PNA]_{t=0}} \times \frac{R_{a, PNA}}{R_{a, FFA}} \times \frac{(k_{obs, FFA} \times k_d)}{(k_{obs, PNA} \times k_{FFA})} \quad (S7)$$

The quantum yield coefficient of <sup>3</sup>DOM ( $f_{TMP}$ , M<sup>-1</sup>) was calculated as described previously<sup>8</sup> using  $\Phi_{PNA}$ ,  $[PNA]_{t=0}$ ,  $k_{obs, PNA}$ ,  $R_{a, PNA}$ , and the rate of light absorption of TMP ( $R_{a, TMP}$ ):

$$f_{TMP} = \frac{\Phi_{PNA}}{[PNA]_{t=0}} \times \frac{R_{a, PNA}}{R_{a, TMP}} \times \frac{k_{obs, TMP}}{k_{obs, PNA}} \quad (S8)$$

The quantum yield of hydroxyl radical ( $\Phi_{\bullet OH}$ ) was calculated using  $[\bullet OH]_{ss}$ ,  $R_{a, TPA}$ ,  $[HCO_3^-]$ ,  $[CO_3^{2-}]$ , and  $[DOC]$ :<sup>2,9,10</sup>

$$\Phi_{\bullet OH} = \frac{k_{\bullet OH, HCO_3} [HCO_3^-] + k_{\bullet OH, CO_3} [CO_3^{2-}] + k_{\bullet OH, DOC} [DOC] [\bullet OH]_{ss}}{R_a} \quad (S9)$$

where  $k_{\text{OH,HCO}_3} = 8.5 \times 10^6 \text{ M}^{-1} \text{ s}^{-1}$ ,  $k_{\text{OH,CO}_3} = 3.9 \times 10^8 \text{ M}^{-1} \text{ s}^{-1}$ , and  $k_{\text{OH,DOM}} = 1.9 \times 10^4 \text{ mg-C}^{-1} \text{ L s}^{-1}$ .<sup>9,10</sup>

**Table S6.** Quantum yields and/or quantum yield coefficients, as well as steady-state concentrations, for  $^3\text{DOM}$ ,  $^1\text{O}_2$ , and  $^{\bullet}\text{OH}$ . Error represents the standard deviation of triplicate measurements. Measurements of  $\Phi_{\text{OH}}$  are not available for two of the wastewater samples due to fluorescence interference in these samples.

| Sample                    | $f_{\text{TMP}}$<br>( $\text{M}^{-1}$ ) | $\Phi_{1\text{O}_2}$           | $\Phi_{\text{OH}}$              | $[^3\text{DOM}]_{\text{ss}}$<br>( $\text{M}$ ) | $[^1\text{O}_2]_{\text{ss}}$ ( $\text{M}$ ) | $[^{\bullet}\text{OH}]_{\text{ss}}$ ( $\text{M}$ ) |
|---------------------------|-----------------------------------------|--------------------------------|---------------------------------|------------------------------------------------|---------------------------------------------|----------------------------------------------------|
| <i>Northern Lakes</i>     |                                         |                                |                                 |                                                |                                             |                                                    |
| Crystal Bog (N1)          | $11.6 \pm 0.4$                          | $(1.4 \pm 0.2) \times 10^{-2}$ | $(8 \pm 1) \times 10^{-5}$      | $(3.2 \pm 0.1) \times 10^{-14}$                | $(4.1 \pm 0.5) \times 10^{-13}$             | $(3.8 \pm 0.5) \times 10^{-16}$                    |
| Trout Bog (N2)            | $14.62 \pm 0.03$                        | $(1.1 \pm 0.1) \times 10^{-2}$ | $(1.2 \pm 0.1) \times 10^{-4}$  | $(4.1 \pm 0.1) \times 10^{-14}$                | $(8.4 \pm 0.9) \times 10^{-13}$             | $(6.3 \pm 0.6) \times 10^{-16}$                    |
| Allequash Lake (N3)       | $20.8 \pm 0.7$                          | $(2.1 \pm 0.1) \times 10^{-2}$ | $(4.6 \pm 0.8) \times 10^{-5}$  | $(4.7 \pm 0.2) \times 10^{-14}$                | $(2.0 \pm 0.1) \times 10^{-13}$             | $(1.9 \pm 0.4) \times 10^{-16}$                    |
| Big Muskellunge Lake (N4) | $19.8 \pm 0.4$                          | $(3.3 \pm 0.6) \times 10^{-2}$ | $(5.0 \pm 0.8) \times 10^{-5}$  | $(1.5 \pm 0.1) \times 10^{-14}$                | $(9 \pm 2) \times 10^{-14}$                 | $(8 \pm 1) \times 10^{-17}$                        |
| Crystal Lake (N5)         | $12.1 \pm 0.9$                          | $(2.5 \pm 0.3) \times 10^{-2}$ | $(4 \pm 1) \times 10^{-5}$      | $(5.8 \pm 0.4) \times 10^{-15}$                | $(4.3 \pm 0.7) \times 10^{-14}$             | $(7 \pm 2) \times 10^{-17}$                        |
| Sparkling Lake (N6)       | $26.5 \pm 0.6$                          | $(2.5 \pm 0.6) \times 10^{-2}$ | $(3.4 \pm 0.2) \times 10^{-5}$  | $(2.6 \pm 0.1) \times 10^{-14}$                | $(7.8 \pm 0.9) \times 10^{-14}$             | $(8.8 \pm 0.5) \times 10^{-17}$                    |
| Trout Lake (N7)           | $15.8 \pm 0.7$                          | $(2.8 \pm 0.2) \times 10^{-2}$ | $(3.2 \pm 0.96) \times 10^{-5}$ | $(1.2 \pm 0.1) \times 10^{-14}$                | $(7.4 \pm 0.6) \times 10^{-14}$             | $(7 \pm 2) \times 10^{-17}$                        |
| <i>Mankato</i>            |                                         |                                |                                 |                                                |                                             |                                                    |
| Memories (M1)             | $44 \pm 2$                              | $(7.3 \pm 0.3) \times 10^{-2}$ | $(4.5 \pm 0.3) \times 10^{-5}$  | $(1.1 \pm 0.1) \times 10^{-13}$                | $(4.2 \pm 0.1) \times 10^{-13}$             | $(1.9 \pm 0.2) \times 10^{-16}$                    |
| Olsen Ditch (M2)          | $55 \pm 2$                              | $(4.6 \pm 0.1) \times 10^{-2}$ | $(9.9 \pm 0.2) \times 10^{-5}$  | $(1.0 \pm 0.1) \times 10^{-13}$                | $(4.7 \pm 0.6) \times 10^{-13}$             | $(6.1 \pm 0.1) \times 10^{-16}$                    |
| Wammer Ditch (M3)         | $41.5 \pm 0.8$                          | $(4.0 \pm 0.1) \times 10^{-2}$ | $(5.7 \pm 0.4) \times 10^{-5}$  | $(7.8 \pm 0.2) \times 10^{-14}$                | $(3.1 \pm 0.1) \times 10^{-13}$             | $(2.4 \pm 0.2) \times 10^{-16}$                    |
| Seven-mile Creek (M4)     | $39.7 \pm 0.1$                          | $(4.3 \pm 0.1) \times 10^{-2}$ | $(3.4 \pm 0.3) \times 10^{-5}$  | $(1.1 \pm 0.1) \times 10^{-13}$                | $(4.7 \pm 0.1) \times 10^{-13}$             | $(1.9 \pm 0.2) \times 10^{-16}$                    |
| Kiwannis (M5)             | $47.3 \pm 0.8$                          | $(4.4 \pm 0.1) \times 10^{-2}$ | $(3.5 \pm 0.2) \times 10^{-5}$  | $(1.1 \pm 0.1) \times 10^{-13}$                | $(4.1 \pm 0.1) \times 10^{-13}$             | $(1.5 \pm 0.1) \times 10^{-16}$                    |
| <i>Yahara</i>             |                                         |                                |                                 |                                                |                                             |                                                    |
| North Yahara (Y1)         | $30.3 \pm 0.3$                          | $(3.1 \pm 0.1) \times 10^{-2}$ | $(2.7 \pm 0.1) \times 10^{-4}$  | $(9.4 \pm 0.1) \times 10^{-14}$                | $(4.3 \pm 0.1) \times 10^{-13}$             | $(1.4 \pm 0.1) \times 10^{-15}$                    |
| Lake Mendota (Y2)         | $39.1 \pm 0.7$                          | $(2.8 \pm 0.3) \times 10^{-2}$ | $(9.7 \pm 0.2) \times 10^{-6}$  | $(6.2 \pm 0.1) \times 10^{-14}$                | $(1.9 \pm 0.2) \times 10^{-13}$             | $(3.2 \pm 0.1) \times 10^{-16}$                    |

|                               |                  |                                |                                |                                 |                                 |                                 |
|-------------------------------|------------------|--------------------------------|--------------------------------|---------------------------------|---------------------------------|---------------------------------|
| Lake Wingra (Y3)              | $33 \pm 1$       | $(3.2 \pm 0.1) \times 10^{-2}$ | $(5.6 \pm 0.6) \times 10^{-5}$ | $(7.7 \pm 0.3) \times 10^{-14}$ | $(3.2 \pm 0.1) \times 10^{-13}$ | $(2.5 \pm 0.2) \times 10^{-16}$ |
| Lake Kegonsa (Y4)             | $56.6 \pm 0.3$   | $(5.3 \pm 0.1) \times 10^{-2}$ | $(1.4 \pm 0.1) \times 10^{-4}$ | $(6.2 \pm 0.1) \times 10^{-14}$ | $(5.3 \pm 0.1) \times 10^{-13}$ | $(2.6 \pm 0.2) \times 10^{-16}$ |
| South Yahara (Y5)             | $40.58 \pm 0.08$ | $(2.8 \pm 0.2) \times 10^{-2}$ | $(2.7 \pm 0.5) \times 10^{-5}$ | $(6.3 \pm 0.1) \times 10^{-14}$ | $(2.7 \pm 0.2) \times 10^{-13}$ | $(7 \pm 1) \times 10^{-17}$     |
| Badfish Upstream (Y6)         | $45 \pm 1$       | $(3.8 \pm 0.1) \times 10^{-2}$ | $(4.3 \pm 0.1) \times 10^{-5}$ | $(9.1 \pm 0.3) \times 10^{-14}$ | $(2.9 \pm 0.1) \times 10^{-13}$ | $(2.4 \pm 0.1) \times 10^{-16}$ |
| Badfish Downstream (Y7)       | $41 \pm 2$       | $(2.8 \pm 0.1) \times 10^{-2}$ | $(1.1 \pm 0.2) \times 10^{-4}$ | $(7.8 \pm 0.2) \times 10^{-14}$ | $(3.0 \pm 0.1) \times 10^{-13}$ | $(5 \pm 1) \times 10^{-16}$     |
| Confluence (Y8)               | $47.3 \pm 0.5$   | $(2.4 \pm 0.9) \times 10^{-2}$ | $(3.0 \pm 0.8) \times 10^{-5}$ | $(8.6 \pm 0.1) \times 10^{-14}$ | $(1.8 \pm 0.4) \times 10^{-13}$ | $(1.0 \pm 0.3) \times 10^{-16}$ |
| <b><i>St. Louis River</i></b> |                  |                                |                                |                                 |                                 |                                 |
| Sand Creek (S1)               | $23 \pm 5$       | $(6 \pm 1) \times 10^{-3}$     | $(5.8 \pm 0.1) \times 10^{-4}$ | $(4.2 \pm 1.0) \times 10^{-14}$ | $(8 \pm 1) \times 10^{-13}$     | $(2.0 \pm 0.1) \times 10^{-15}$ |
| Meadowlands (S2)              | $30 \pm 2$       | $(1.1 \pm 0.1) \times 10^{-2}$ | $(1.4 \pm 0.1) \times 10^{-4}$ | $(8.6 \pm 0.5) \times 10^{-14}$ | $(6.0 \pm 0.1) \times 10^{-13}$ | $(7.2 \pm 0.1) \times 10^{-16}$ |
| River Inn (S3)                | $31 \pm 3$       | $(1.4 \pm 0.1) \times 10^{-2}$ | $(1.3 \pm 0.1) \times 10^{-4}$ | $(8.7 \pm 0.8) \times 10^{-14}$ | $(6.1 \pm 0.1) \times 10^{-13}$ | $(6.5 \pm 0.1) \times 10^{-16}$ |
| Munger Landing (S4)           | $31.0 \pm 0.5$   | $(1.7 \pm 0.1) \times 10^{-2}$ | $(7.1 \pm 0.2) \times 10^{-5}$ | $(8.4 \pm 0.1) \times 10^{-14}$ | $(6.4 \pm 0.4) \times 10^{-13}$ | $(3.5 \pm 0.1) \times 10^{-16}$ |
| East Detroit (S5)             | $30.3 \pm 0.1$   | $(1.6 \pm 0.1) \times 10^{-2}$ | $(8.4 \pm 0.1) \times 10^{-5}$ | $(8.2 \pm 0.1) \times 10^{-14}$ | $(6.3 \pm 0.1) \times 10^{-13}$ | $(4.2 \pm 0.1) \times 10^{-16}$ |
| Blatnik Bridge (S6)           | $27 \pm 2$       | $(1.8 \pm 0.1) \times 10^{-2}$ | $(6.8 \pm 0.2) \times 10^{-5}$ | $(5.9 \pm 0.4) \times 10^{-14}$ | $(5.2 \pm 0.3) \times 10^{-13}$ | $(2.7 \pm 0.1) \times 10^{-16}$ |
| Wisconsin Point (S7)          | $14 \pm 2$       | $(2.3 \pm 0.1) \times 10^{-2}$ | $(1.4 \pm 0.1) \times 10^{-4}$ | $(5.9 \pm 0.9) \times 10^{-15}$ | $(4.9 \pm 1.0) \times 10^{-14}$ | $(1.1 \pm 0.1) \times 10^{-16}$ |
| <b><i>Twin Cities</i></b>     |                  |                                |                                |                                 |                                 |                                 |
| River Front Park (T1)         | $61.1 \pm 0.7$   | $(4.7 \pm 0.1) \times 10^{-2}$ | $(1.9 \pm 0.1) \times 10^{-4}$ | $(4.3 \pm 0.1) \times 10^{-14}$ | $(6.7 \pm 0.1) \times 10^{-13}$ | $(2.6 \pm 0.1) \times 10^{-16}$ |
| East River Parkway (T2)       | $50 \pm 2$       | $(3.2 \pm 0.1) \times 10^{-2}$ | $(1.1 \pm 0.1) \times 10^{-5}$ | $(6.3 \pm 0.2) \times 10^{-14}$ | $(4.7 \pm 0.1) \times 10^{-13}$ | $(2.7 \pm 0.1) \times 10^{-16}$ |
| Minnesota River (T3)          | $87.1 \pm 0.5$   | $(5.9 \pm 0.1) \times 10^{-2}$ | $(2.4 \pm 0.1) \times 10^{-4}$ | $(1.2 \pm 0.1) \times 10^{-13}$ | $(4.1 \pm 0.1) \times 10^{-13}$ | $(8.7 \pm 0.4) \times 10^{-16}$ |
| Metro Downstream (T4)         | $37.8 \pm 0.7$   | $(3.7 \pm 0.6) \times 10^{-2}$ | $(1.1 \pm 0.1) \times 10^{-4}$ | $(8.6 \pm 0.1) \times 10^{-14}$ | $(5 \pm 1) \times 10^{-13}$     | $(4.2 \pm 0.3) \times 10^{-16}$ |
| Eagles Point Downstream (T5)  | $26.8 \pm 0.5$   | $(3.7 \pm 0.1) \times 10^{-2}$ | $(1.3 \pm 0.1) \times 10^{-4}$ | $(8.7 \pm 0.5) \times 10^{-14}$ | $(4.8 \pm 0.1) \times 10^{-13}$ | $(4.7 \pm 0.2) \times 10^{-16}$ |
| Lake of the Isles (T6)        | $78 \pm 3$       | $(5.8 \pm 0.3) \times 10^{-2}$ | $(5.3 \pm 0.9) \times 10^{-5}$ | $(5.6 \pm 0.2) \times 10^{-14}$ | $(2.4 \pm 0.1) \times 10^{-13}$ | $(7 \pm 1) \times 10^{-17}$     |
| Vadnais Lake (T7)             | $60 \pm 3$       | $(4.7 \pm 0.1) \times 10^{-2}$ | $(3.4 \pm 0.3) \times 10^{-5}$ | $(7.4 \pm 0.3) \times 10^{-14}$ | $(2.9 \pm 0.1) \times 10^{-13}$ | $(7.5 \pm 0.5) \times 10^{-17}$ |

|                               |                |                                |                                |                                 |                                 |                                 |
|-------------------------------|----------------|--------------------------------|--------------------------------|---------------------------------|---------------------------------|---------------------------------|
| Lake Phalen<br>(T8)           | $80 \pm 4$     | $(7 \pm 1) \times 10^{-2}$     | $(3.4 \pm 0.4) \times 10^{-6}$ | $(7.6 \pm 0.4) \times 10^{-14}$ | $(2.4 \pm 0.3) \times 10^{-13}$ | $(5.7 \pm 0.6) \times 10^{-17}$ |
| <i>Wastewaters</i>            |                |                                |                                |                                 |                                 |                                 |
| WRRF Pre-Cl<br>(W1)           | $37.1 \pm 0.6$ | $(3.0 \pm 0.5) \times 10^{-2}$ | $(4.8 \pm 0.4) \times 10^{-5}$ | $(7.4 \pm 0.1) \times 10^{-14}$ | $(2.1 \pm 0.3) \times 10^{-13}$ | $(1.7 \pm 0.1) \times 10^{-16}$ |
| WRRF Reuse<br>(W2)            | $57.0 \pm 0.9$ | $(7.7 \pm 0.3) \times 10^{-2}$ | $(1.0 \pm 0.1) \times 10^{-4}$ | $(5.2 \pm 0.1) \times 10^{-14}$ | $(2.6 \pm 0.2) \times 10^{-13}$ | $(1.6 \pm 0.2) \times 10^{-16}$ |
| WRRF Post-Cl<br>(W3)          | $37.5 \pm 0.4$ | $(5.8 \pm 0.8) \times 10^{-2}$ | $(4.2 \pm 0.3) \times 10^{-5}$ | $(1.1 \pm 0.1) \times 10^{-13}$ | $(3.0 \pm 0.4) \times 10^{-13}$ | $(2.0 \pm 0.2) \times 10^{-16}$ |
| Nine Springs<br>Pre-UV (W4)   | $29.0 \pm 0.8$ | $(3.4 \pm 0.1) \times 10^{-2}$ | $(5.3 \pm 0.4) \times 10^{-5}$ | $(7.7 \pm 0.2) \times 10^{-14}$ | $(3.8 \pm 0.1) \times 10^{-13}$ | $(2.3 \pm 0.2) \times 10^{-16}$ |
| Nine Springs<br>Post-UV (W5)  | $43.7 \pm 0.5$ | $(3.9 \pm 0.1) \times 10^{-2}$ | $(3.1 \pm 0.1) \times 10^{-5}$ | $(7.2 \pm 0.1) \times 10^{-14}$ | $(4.3 \pm 0.1) \times 10^{-13}$ | $(1.2 \pm 0.1) \times 10^{-16}$ |
| WLSSD Influent<br>(W6)        | $17 \pm 1$     | $(1.1 \pm 0.1) \times 10^{-2}$ | NA                             | $(4.4 \pm 0.2) \times 10^{-14}$ | $(4.0 \pm 0.1) \times 10^{-13}$ | NA                              |
| WLSSD Effluent<br>(W7)        | $22.5 \pm 0.1$ | $(1.6 \pm 0.1) \times 10^{-2}$ | NA                             | $(2.8 \pm 0.1) \times 10^{-14}$ | $(4.7 \pm 0.1) \times 10^{-13}$ | NA                              |
| WLSSD Pre-Cl<br>(W8)          | $21.0 \pm 0.9$ | $(2.0 \pm 0.1) \times 10^{-2}$ | $(1.5 \pm 0.1) \times 10^{-4}$ | $(2.9 \pm 0.1) \times 10^{-14}$ | $(1.3 \pm 0.1) \times 10^{-12}$ | $(3.7 \pm 0.1) \times 10^{-16}$ |
| WLSSD<br>Post-Cl (W9)         | $19.1 \pm 0.7$ | $(2.0 \pm 0.1) \times 10^{-2}$ | $(6.1 \pm 0.1) \times 10^{-4}$ | $(3.2 \pm 0.1) \times 10^{-14}$ | $(1.2 \pm 0.1) \times 10^{-12}$ | $(1.9 \pm 0.1) \times 10^{-16}$ |
| Metro WWTP<br>Pre-Cl (W10)    | $26.9 \pm 0.6$ | $(8.9 \pm 0.1) \times 10^{-2}$ | $(1.1 \pm 0.1) \times 10^{-3}$ | $(4.8 \pm 0.1) \times 10^{-14}$ | $(6.9 \pm 0.1) \times 10^{-13}$ | $(3.3 \pm 0.1) \times 10^{-15}$ |
| Metro WWTP<br>Post-Cl (W11)   | $34.3 \pm 0.1$ | $(7.0 \pm 0.2) \times 10^{-2}$ | $(1.0 \pm 0.1) \times 10^{-3}$ | $(4.6 \pm 0.1) \times 10^{-14}$ | $(5.2 \pm 0.1) \times 10^{-13}$ | $(2.4 \pm 0.1) \times 10^{-15}$ |
| Eagles Point Pre-<br>UV (W12) | $21 \pm 1$     | $(2.6 \pm 0.2) \times 10^{-2}$ | $(2.5 \pm 0.1) \times 10^{-4}$ | $(3.6 \pm 0.2) \times 10^{-14}$ | $(2.2 \pm 0.2) \times 10^{-13}$ | $(7.6 \pm 0.1) \times 10^{-16}$ |
| Eagles Point<br>Post-UV (W13) | $24.0 \pm 0.4$ | $(2.8 \pm 0.1) \times 10^{-2}$ | $(4.0 \pm 0.2) \times 10^{-4}$ | $(3.4 \pm 0.1) \times 10^{-14}$ | $(2.4 \pm 0.1) \times 10^{-13}$ | $(1.0 \pm 0.1) \times 10^{-15}$ |

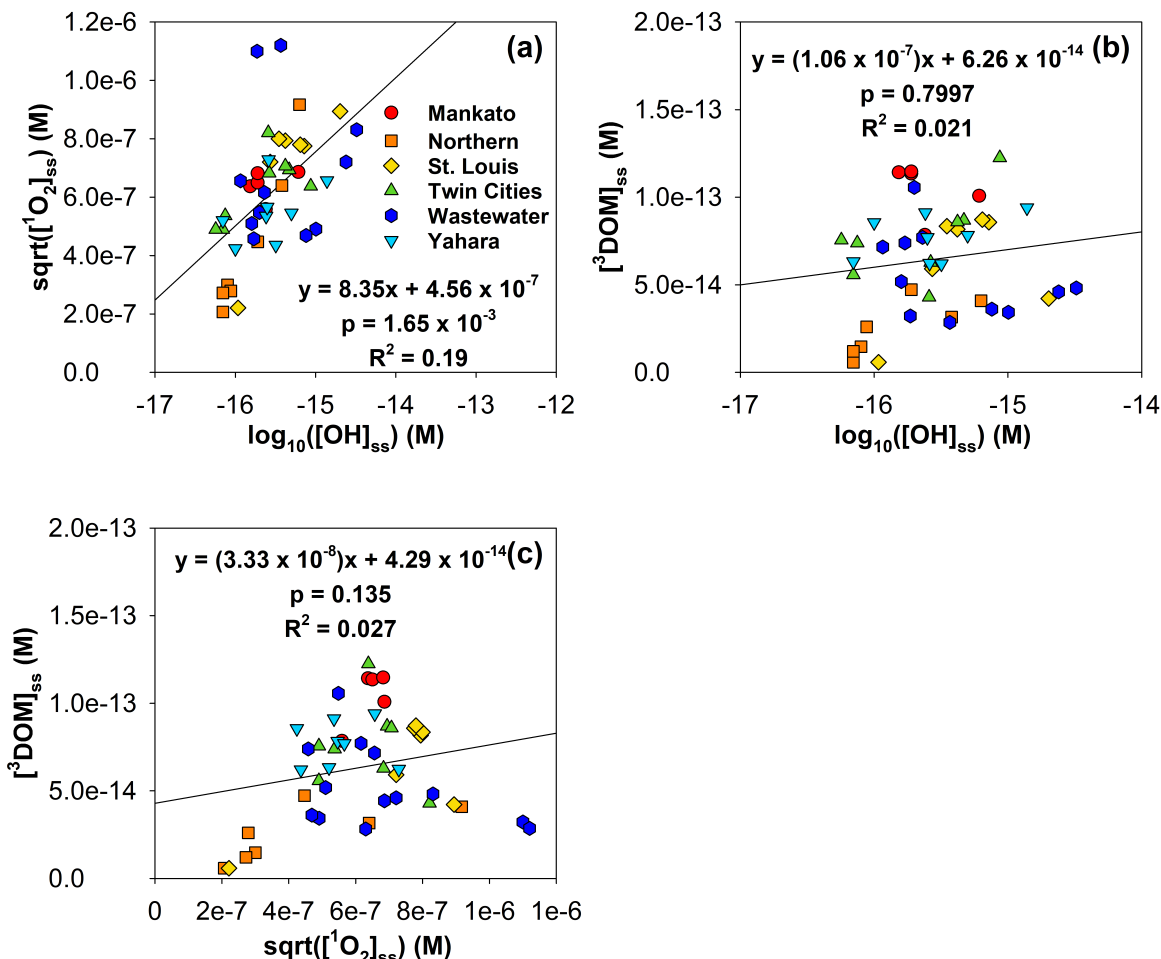

**Figure S1.** Linear regression analysis for (a)  $[^1\text{O}_2]_{\text{ss}}$  plotted against  $[\cdot\text{OH}]_{\text{ss}}$ , (b)  $[^3\text{DOM}]_{\text{ss}}$  plotted against  $[\cdot\text{OH}]_{\text{ss}}$ , and (c)  $[^3\text{DOM}]_{\text{ss}}$  plotted against  $[^1\text{O}_2]_{\text{ss}}$ .  $[^1\text{O}_2]_{\text{ss}}$  and  $[\cdot\text{OH}]_{\text{ss}}$  were transformed by taking the square root and log value, respectively, to achieve a normal distribution.

## Section S6: Contaminant kinetics experiments

**Experimental procedures.** Solutions of atorvastatin, benzotriazole, carbamazepine, and sulfadiazine (**Figure S2**) in each water sample were prepared to achieve a concentration of 10  $\mu\text{M}$ . Solutions were then irradiated in a Luzchem photoreactor (University of St. Thomas) equipped with 16 UVA bulbs (365 nm), which is similar to the light spectrum of the Rayonet reactor (University of Wisconsin-Madison). Aliquots were removed at four time points. Atorvastatin was irradiated for 1 hour and had 15-minute time points. Sulfadiazine was irradiated for 2 hours and had 30-minute time points. Benzotriazole and carbamazepine were irradiated for 48 hours and had

four time points spread throughout the 48-hour period. After irradiation, samples were analyzed using HPLC to determine rate constants of degradation assuming pseudo-first order kinetics. Specifics of HPLC methods for each contaminant are provided in **Table S7**.

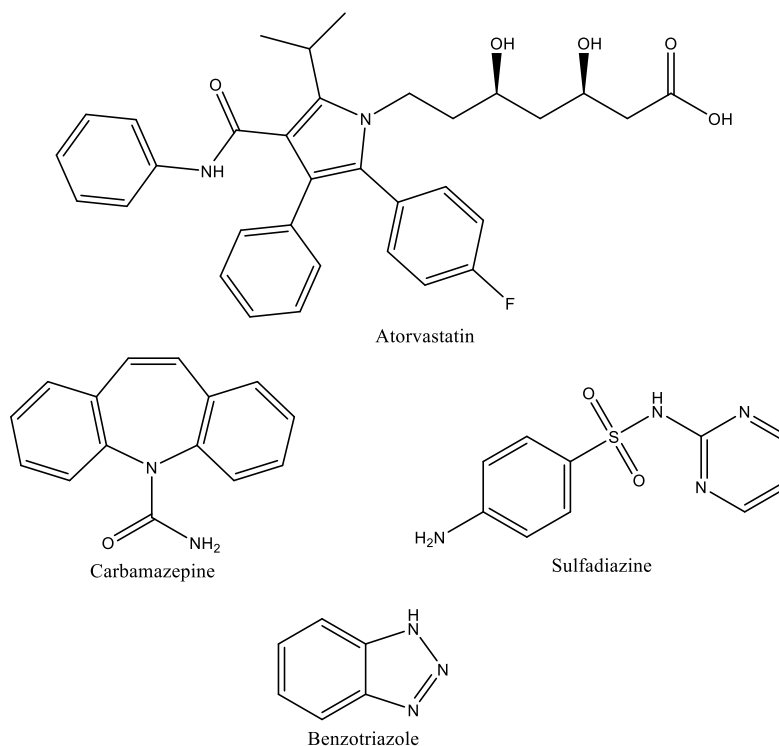

**Figure S2.** Chemical structures of atorvastatin, carbamazepine, sulfadiazine, and benzotriazole.

**Table S7.** HPLC methods used to quantify the four contaminants analyzed in this study.

| <b>Atorvastatin</b>  |                                                                                                                                                            |
|----------------------|------------------------------------------------------------------------------------------------------------------------------------------------------------|
| <b>Duration</b>      | 6.5 min                                                                                                                                                    |
| <b>Pump settings</b> | 1 mL/min flow rate<br>0 min: 50% pH 3 phosphate buffer, 50% ACN<br>4 min: 40% pH 3 phosphate buffer, 60 % ACN<br>5 min: 70% pH 3 phosphate buffer, 30% ACN |
| <b>Column</b>        | Agilent Eclipse XDB-C18 4.6 x 150 mm, 5 µm packing                                                                                                         |
| <b>Elution time</b>  | 4.6 min                                                                                                                                                    |
| <b>Wavelength</b>    | 244 nm                                                                                                                                                     |
| <b>Benzotriazole</b> |                                                                                                                                                            |
| <b>Duration</b>      | 6.0 min                                                                                                                                                    |

|                         |                                                                     |
|-------------------------|---------------------------------------------------------------------|
| <b>Pump settings</b>    | 0.75 mL/min flow rate<br>Isocratic: 40% HPLC water, 60% ACN         |
| <b>Column</b>           | Ascentis RP-Amide 25 cm x 4.6 mm, 5 µm packing                      |
| <b>Elution time</b>     | 5.5 min                                                             |
| <b>Wavelength</b>       | 275 nm                                                              |
| <b>Carbamazepine</b>    |                                                                     |
| <b>Duration</b>         | 5 min                                                               |
| <b>Pump settings</b>    | 1.0 mL/min flow rate<br>Isocratic: 60% HPLC water, 40% ACN          |
| <b>Column</b>           | Agilent Eclipse XDB-C18 4.6x150mm, 5 µm packing                     |
| <b>Elution time</b>     | 3.0 min                                                             |
| <b>Wavelength</b>       | 282 nm                                                              |
| <b>Sulfadiazine</b>     |                                                                     |
| <b>Duration</b>         | 4.5 min                                                             |
| <b>Pump settings</b>    | 1.0 mL/min flow rate<br>Isocratic: 90% pH 4 acetate buffer, 10% ACN |
| <b>Injection volume</b> | 25 µL                                                               |
| <b>Column</b>           | Agilent Eclipse XDB-C18 4.6x150mm, 5 µm packing                     |
| <b>Elution time</b>     | 3.2 min                                                             |
| <b>Wavelength</b>       | 261 nm                                                              |

**Light screening.** All rate constants were adjusted to correct for light screening using the screening factor from equation S4 ( $S_\lambda$ ), light intensity from equation S6 ( $I$ ), and the observed rate constants ( $k_{obs}$ ), to yield a screening corrected observed rate constant ( $k_{obs, corr}$ ):

$$k_{obs,corr} = \frac{k_{obs}}{S_\lambda I_\lambda / I_{total}} \quad (S10)$$

where  $I_{total}$  is the summation of light intensities at wavelengths 325 – 405 nm.

**Table S8.** Indirect rate constants for the four contaminants in all waters.

| <b>Sample</b>         | <b><math>k_{indirect, atorvastatin}</math><br/>(hr<sup>-1</sup>)</b> | <b><math>k_{indirect, carbamazepine}</math><br/>(hr<sup>-1</sup>)</b> | <b><math>k_{indirect, sulfadiazine}</math><br/>(hr<sup>-1</sup>)</b> | <b><math>k_{indirect, benzotriazole}</math><br/>(hr<sup>-1</sup>)</b> |
|-----------------------|----------------------------------------------------------------------|-----------------------------------------------------------------------|----------------------------------------------------------------------|-----------------------------------------------------------------------|
| <b>Northern Lakes</b> |                                                                      |                                                                       |                                                                      |                                                                       |
| Crystal Bog (N1)      | (6.34 ± 0.40)<br>x 10 <sup>-1</sup>                                  | (1.11 ± 0.32)<br>x 10 <sup>-3</sup>                                   | (3.11 ± 0.58)<br>x 10 <sup>-2</sup>                                  | (1.82 ± 0.96)<br>x 10 <sup>-3</sup>                                   |
| Trout Bog (N2)        | (4.90 ± 0.34)<br>x 10 <sup>-1</sup>                                  | (2.51 ± 0.30)<br>x 10 <sup>-3</sup>                                   | (1.66 ± 0.46)<br>x 10 <sup>-2</sup>                                  | (9.45 ± 0.12)<br>x 10 <sup>-3</sup>                                   |
| Allequash Lake (N3)   | (5.12 ± 0.38)<br>x 10 <sup>-1</sup>                                  | (2.30 ± 0.50)<br>x 10 <sup>-3</sup>                                   | (9.75 ± 4.99)<br>x 10 <sup>-3</sup>                                  | 0                                                                     |

|                               |                                   |                                  |                                  |                                  |
|-------------------------------|-----------------------------------|----------------------------------|----------------------------------|----------------------------------|
| Big Muskellunge Lake (N4)     | $(6.75 \pm 2.70) \times 10^{-2}$  | $(6.41 \pm 2.63) \times 10^{-4}$ | $(1.02 \pm 0.18) \times 10^{-1}$ | 0                                |
| Crystal Lake (N5)             | $(4.16 \pm 2.75) \times 10^{-2}$  | $(1.80 \pm 2.48) \times 10^{-4}$ | $(1.45 \pm 2.79) \times 10^{-2}$ | 0                                |
| Sparkling Lake (N6)           | $(3.90 \pm 0.33) \times 10^{-1}$  | $(2.00 \pm 0.37) \times 10^{-3}$ | $(4.54 \pm 0.66) \times 10^{-2}$ | 0                                |
| Trout Lake (N7)               | $(8.69 \pm 2.42) \times 10^{-2}$  | $(9.05 \pm 2.52) \times 10^{-4}$ | $(3.32 \pm 0.72) \times 10^{-2}$ | 0                                |
| <b><i>Mankato</i></b>         |                                   |                                  |                                  |                                  |
| Memories (M1)                 | $(6.10 \pm 0.27) \times 10^{-1}$  | $(7.96 \pm 0.36) \times 10^{-3}$ | $(9.88 \pm 0.63) \times 10^{-2}$ | $(1.76 \pm 0.99) \times 10^{-3}$ |
| Olsen Ditch (M2)              | $(5.49 \pm 0.48) \times 10^{-1}$  | $(8.04 \pm 0.29) \times 10^{-3}$ | $(2.69 \pm 0.06) \times 10^{-1}$ | $(0.37 \pm 1.01) \times 10^{-3}$ |
| Wammer Ditch (M3)             | $(5.98 \pm 0.30) \times 10^{-1}$  | $(6.74 \pm 0.30) \times 10^{-3}$ | $(8.32 \pm 0.70) \times 10^{-2}$ | 0                                |
| Seven-mile Creek (M4)         | $(7.21 \pm 0.36) \times 10^{-1}$  | $(9.34 \pm 0.36) \times 10^{-3}$ | $(7.63 \pm 0.61) \times 10^{-2}$ | $(2.10 \pm 1.08) \times 10^{-3}$ |
| Kiwannis (M5)                 | $(6.60 \pm 0.26) \times 10^{-1}$  | $(8.55 \pm 0.40) \times 10^{-3}$ | $(8.45 \pm 1.17) \times 10^{-2}$ | $(1.76 \pm 0.99) \times 10^{-3}$ |
| <b><i>Yahara</i></b>          |                                   |                                  |                                  |                                  |
| North Yahara (Y1)             | $(6.56 \pm 0.29) \times 10^{-1}$  | $(6.40 \pm 0.32) \times 10^{-3}$ | $(3.26 \pm 0.90) \times 10^{-2}$ | $(3.39 \pm 0.99) \times 10^{-3}$ |
| Lake Mendota (Y2)             | $(3.19 \pm 0.25) \times 10^{-1}$  | $(3.33 \pm 0.35) \times 10^{-3}$ | $(1.14 \pm 0.31) \times 10^{-1}$ | 0                                |
| Lake Wingra (Y3)              | $(4.27 \pm 0.26) \times 10^{-1}$  | $(4.78 \pm 0.27) \times 10^{-3}$ | $(5.87 \pm 0.33) \times 10^{-2}$ | $(0.43 \pm 1.02) \times 10^{-3}$ |
| Lake Kegonsa (Y4)             | $(4.69 \pm 0.28) \times 10^{-1}$  | $(8.33 \pm 6.70) \times 10^{-3}$ | $(1.12 \pm 0.03) \times 10^{-1}$ | $(5.90 \pm 1.14) \times 10^{-3}$ |
| South Yahara (Y5)             | $(4.39 \pm 0.31) \times 10^{-1}$  | $(5.07 \pm 0.29) \times 10^{-3}$ | $(1.08 \pm 0.05) \times 10^{-1}$ | $(0.80 \pm 9.95) \times 10^{-4}$ |
| Badfish Upstream (Y6)         | $(4.27 \pm 0.28) \times 10^{-1}$  | $(5.28 \pm 0.23) \times 10^{-3}$ | $(1.08 \pm 0.09) \times 10^{-1}$ | $(1.37 \pm 0.96) \times 10^{-3}$ |
| Badfish Downstream (Y7)       | $(4.90 \pm 0.27) \times 10^{-1}$  | $(7.31 \pm 0.40) \times 10^{-3}$ | $(2.22 \pm 0.65) \times 10^{-2}$ | $(2.79 \pm 1.05) \times 10^{-3}$ |
| Confluence (Y8)               | $(4.18 \pm 0.28) \times 10^{-1}$  | $(4.25 \pm 0.37) \times 10^{-3}$ | $(7.53 \pm 0.61) \times 10^{-2}$ | 0                                |
| <b><i>St. Louis River</i></b> |                                   |                                  |                                  |                                  |
| Sand Creek (S1)               | $(14.25 \pm 0.30) \times 10^{-1}$ | $(9.54 \pm 0.41) \times 10^{-3}$ | $(1.03 \pm 0.06) \times 10^{-1}$ | $(1.31 \pm 0.34) \times 10^{-2}$ |
| Meadowlands (S2)              | $(10.77 \pm 0.25) \times 10^{-1}$ | $(9.45 \pm 0.23) \times 10^{-3}$ | $(4.19 \pm 0.31) \times 10^{-2}$ | $(3.56 \pm 1.15) \times 10^{-3}$ |
| River Inn (S3)                | $(10.32 \pm 0.24) \times 10^{-1}$ | $(8.19 \pm 0.29) \times 10^{-3}$ | $(3.59 \pm 0.34) \times 10^{-2}$ | $(4.74 \pm 1.05) \times 10^{-3}$ |
| Munger Landing (S4)           | $(10.12 \pm 0.23) \times 10^{-1}$ | $(8.18 \pm 0.28) \times 10^{-3}$ | $(3.85 \pm 0.47) \times 10^{-2}$ | $(2.55 \pm 1.09) \times 10^{-3}$ |
| East Detroit (S5)             | $(9.85 \pm 0.32) \times 10^{-1}$  | $(7.54 \pm 0.46) \times 10^{-3}$ | $(4.25 \pm 0.28) \times 10^{-2}$ | $(2.84 \pm 1.10) \times 10^{-3}$ |
| Blatnik Bridge (S6)           | $(7.68 \pm 0.26) \times 10^{-1}$  | $(6.76 \pm 0.42) \times 10^{-3}$ | $(1.67 \pm 0.69) \times 10^{-2}$ | $(1.09 \pm 1.15) \times 10^{-3}$ |

|                              |                                   |                                   |                                  |                                  |
|------------------------------|-----------------------------------|-----------------------------------|----------------------------------|----------------------------------|
|                              | $\times 10^{-1}$                  | $\times 10^{-3}$                  | $\times 10^{-2}$                 | $\times 10^{-3}$                 |
| Wisconsin Point (S7)         | $(5.86 \pm 2.62) \times 10^{-2}$  | $(8.46 \pm 2.33) \times 10^{-4}$  | $(4.89 \pm 0.40) \times 10^{-2}$ | 0                                |
| <b><i>Twin Cities</i></b>    |                                   |                                   |                                  |                                  |
| River Front Park (T1)        | $(7.42 \pm 0.25) \times 10^{-1}$  | $(8.30 \pm 0.32) \times 10^{-3}$  | $(7.62 \pm 0.35) \times 10^{-2}$ | $(1.39 \pm 0.99) \times 10^{-3}$ |
| East River Parkway (T2)      | $(7.25 \pm 0.23) \times 10^{-1}$  | $(8.09 \pm 0.35) \times 10^{-3}$  | $(5.37 \pm 0.41) \times 10^{-2}$ | $(8.85 \pm 9.57) \times 10^{-4}$ |
| Minnesota River (T3)         | $(6.40 \pm 0.25) \times 10^{-1}$  | $(9.38 \pm 0.34) \times 10^{-3}$  | $(1.59 \pm 0.08) \times 10^{-1}$ | $(1.86 \pm 1.00) \times 10^{-3}$ |
| Metro Downstream (T4)        | $(6.83 \pm 0.26) \times 10^{-1}$  | $(8.31 \pm 0.55) \times 10^{-3}$  | $(5.15 \pm 0.31) \times 10^{-2}$ | $(1.47 \pm 0.98) \times 10^{-3}$ |
| Eagles Point Downstream (T5) | $(6.94 \pm 0.51) \times 10^{-1}$  | $(7.78 \pm 0.59) \times 10^{-3}$  | $(6.45 \pm 0.04) \times 10^{-2}$ | $(0.52 \pm 1.11) \times 10^{-3}$ |
| Lake of the Isles (T6)       | $(3.77 \pm 0.26) \times 10^{-1}$  | $(5.43 \pm 0.26) \times 10^{-3}$  | $(6.30 \pm 0.59) \times 10^{-2}$ | 0                                |
| Vadnais Lake (T7)            | $(4.67 \pm 0.23) \times 10^{-1}$  | $(5.61 \pm 0.28) \times 10^{-3}$  | $(1.08 \pm 0.03) \times 10^{-1}$ | $(0.54 \pm 1.03) \times 10^{-3}$ |
| Lake Phalen (T8)             | $(4.49 \pm 0.25) \times 10^{-1}$  | $(8.01 \pm 0.33) \times 10^{-3}$  | $(1.51 \pm 0.06) \times 10^{-1}$ | 0                                |
| <b><i>Wastewaters</i></b>    |                                   |                                   |                                  |                                  |
| WRRF Pre-C1 (W1)             | $(5.18 \pm 0.33) \times 10^{-1}$  | $(6.91 \pm 0.28) \times 10^{-3}$  | $(6.32 \pm 0.32) \times 10^{-2}$ | $(4.11 \pm 1.01) \times 10^{-3}$ |
| WRRF Reuse (W2)              | $(5.19 \pm 0.23) \times 10^{-1}$  | $(7.57 \pm 0.34) \times 10^{-3}$  | $(8.27 \pm 1.24) \times 10^{-2}$ | $(2.80 \pm 0.97) \times 10^{-3}$ |
| WRRF Post-C1 (W3)            | $(5.85 \pm 0.24) \times 10^{-1}$  | $(10.47 \pm 0.56) \times 10^{-3}$ | $(1.57 \pm 0.12) \times 10^{-1}$ | $(3.52 \pm 1.01) \times 10^{-3}$ |
| Nine Springs Pre-UV (W4)     | $(4.37 \pm 0.96) \times 10^{-1}$  | $(7.87 \pm 0.24) \times 10^{-3}$  | $(1.46 \pm 0.27) \times 10^{-2}$ | $(2.46 \pm 1.05) \times 10^{-3}$ |
| Nine Springs Post-UV (W5)    | $(4.57 \pm 0.23) \times 10^{-1}$  | $(7.58 \pm 0.31) \times 10^{-3}$  | $(1.70 \pm 0.66) \times 10^{-2}$ | $(2.35 \pm 1.00) \times 10^{-3}$ |
| WLSSD Influent (W6)          | $(5.74 \pm 0.24) \times 10^{-1}$  | $(4.73 \pm 0.33) \times 10^{-3}$  | 0                                | $(2.02 \pm 1.00) \times 10^{-3}$ |
| WLSSD Effluent (W7)          | $(6.05 \pm 0.27) \times 10^{-1}$  | $(6.53 \pm 0.33) \times 10^{-3}$  | 0                                | $(1.35 \pm 0.15) \times 10^{-2}$ |
| WLSSD Pre-C1 (W8)            | $(12.36 \pm 0.33) \times 10^{-1}$ | $(26.45 \pm 0.35) \times 10^{-3}$ | $(1.76 \pm 0.35) \times 10^{-2}$ | $(3.09 \pm 0.96) \times 10^{-3}$ |
| WLSSD Post-C1 (W9)           | $(12.21 \pm 0.26) \times 10^{-1}$ | $(26.40 \pm 0.31) \times 10^{-3}$ | $(9.64 \pm 3.58) \times 10^{-3}$ | $(2.84 \pm 1.09) \times 10^{-3}$ |
| Metro WWTP Pre-C1 (W10)      | $(4.36 \pm 0.29) \times 10^{-1}$  | $(8.98 \pm 0.43) \times 10^{-3}$  | $(1.53 \pm 0.07) \times 10^{-1}$ | $(3.25 \pm 0.97) \times 10^{-3}$ |
| Metro WWTP Post-C1 (W11)     | $(7.43 \pm 0.28) \times 10^{-1}$  | $(10.31 \pm 0.47) \times 10^{-3}$ | $(7.28 \pm 0.53) \times 10^{-2}$ | $(3.39 \pm 0.11) \times 10^{-2}$ |
| Eagles Point Pre-UV (W12)    | $(2.66 \pm 0.23) \times 10^{-1}$  | $(6.98 \pm 0.48) \times 10^{-3}$  | 0                                | $(7.76 \pm 1.13) \times 10^{-3}$ |
| Eagles Point Post-UV (W13)   | $(2.64 \pm 0.26) \times 10^{-1}$  | $(7.56 \pm 0.32) \times 10^{-3}$  | 0                                | $(2.87 \pm 1.12) \times 10^{-3}$ |

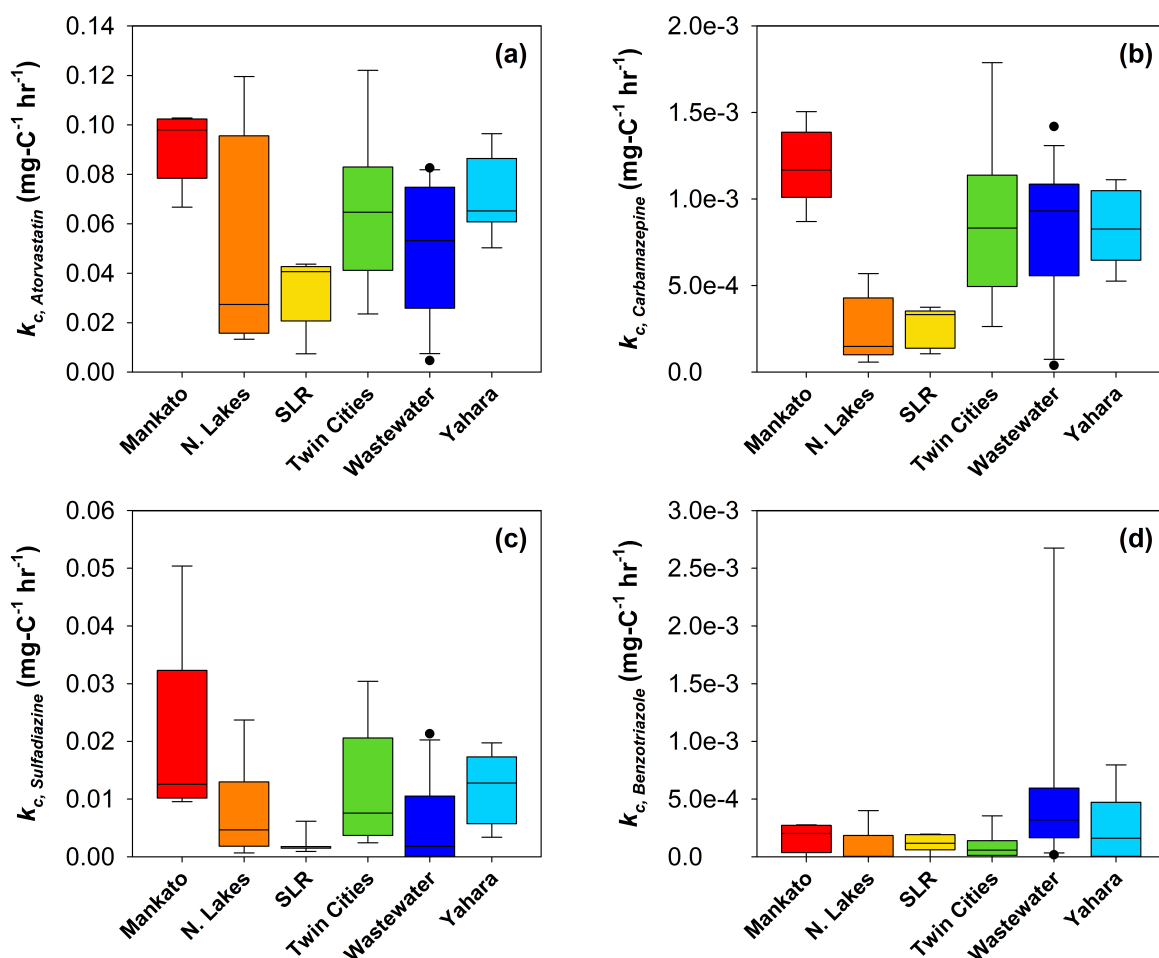

**Figure S3.** Indirect carbon-normalized rate constants ( $k_c$ ) for (a) atorvastatin, (b) carbamazepine, (c) sulfadiazine, and (d) benzotriazole in samples collected from Mankato ( $n = 5$ ), Northern Lakes (N. Lakes;  $n = 7$ ), St. Louis River (SLR;  $n = 7$ ), Twin Cities ( $n = 8$ ), wastewater ( $n = 13$ ), and the Yahara watershed ( $n = 8$ ). Lines in the box-and-whisker plots represent the first and third quartiles. The line within each box represents the median. Whiskers represent minimum and maximum concentrations. Solid points represent outliers (i.e., any point less than the lower quartile or greater than the upper quartile by more than 1.5 times the interquartile range).

**Table S9.** Carbon-normalized indirect rate constants for the four contaminants in all waters. Values of zero represent samples where degradation was faster in the direct controls.

| Sample                | $k_{c, \text{atorvastatin}}$<br>( $\text{hr}^{-1} \text{mg-C}^{-1}$ ) | $k_{c, \text{carbamazepine}}$<br>( $\text{hr}^{-1} \text{mg-C}^{-1}$ ) | $k_{c, \text{sulfadiazine}}$<br>( $\text{hr}^{-1} \text{mg-C}^{-1}$ ) | $k_{c, \text{benzotriazole}}$<br>( $\text{hr}^{-1} \text{mg-C}^{-1}$ ) |
|-----------------------|-----------------------------------------------------------------------|------------------------------------------------------------------------|-----------------------------------------------------------------------|------------------------------------------------------------------------|
| <b>Northern Lakes</b> |                                                                       |                                                                        |                                                                       |                                                                        |
| Crystal Bog (N1)      | $(5.84 \pm 0.37) \times 10^{-2}$                                      | $(1.07 \pm 0.30) \times 10^{-4}$                                       | $(3.00 \pm 0.56) \times 10^{-3}$                                      | $(1.84 \pm 0.97) \times 10^{-4}$                                       |
| Trout Bog (N2)        | $(1.86 \pm 0.15) \times 10^{-2}$                                      | $(1.01 \pm 0.12) \times 10^{-4}$                                       | $(6.71 \pm 1.85) \times 10^{-4}$                                      | $(4.00 \pm 0.52) \times 10^{-4}$                                       |

|                               |                                  |                                  |                                  |                                  |
|-------------------------------|----------------------------------|----------------------------------|----------------------------------|----------------------------------|
| Allequash Lake (N3)           | $(9.02 \pm 0.73) \times 10^{-2}$ | $(4.29 \pm 0.94) \times 10^{-4}$ | $(1.82 \pm 0.93) \times 10^{-3}$ | 0                                |
| Big Muskellunge Lake (N4)     | $(1.57 \pm 0.63) \times 10^{-2}$ | $(1.50 \pm 0.61) \times 10^{-4}$ | $(2.37 \pm 0.43) \times 10^{-2}$ | 0                                |
| Crystal Lake (N5)             | $(1.34 \pm 0.88) \times 10^{-2}$ | $(5.78 \pm 7.99) \times 10^{-5}$ | $(4.65 \pm 8.96) \times 10^{-3}$ | 0                                |
| Sparkling Lake (N6)           | $(1.20 \pm 0.09) \times 10^{-1}$ | $(5.70 \pm 1.04) \times 10^{-4}$ | $(1.30 \pm 0.19) \times 10^{-2}$ | 0                                |
| Trout Lake (N7)               | $(2.74 \pm 0.76) \times 10^{-2}$ | $(2.85 \pm 0.79) \times 10^{-4}$ | $(1.05 \pm 0.23) \times 10^{-2}$ | 0                                |
| <b><i>Mankato</i></b>         |                                  |                                  |                                  |                                  |
| Memories (M1)                 | $(6.67 \pm 0.30) \times 10^{-2}$ | $(8.71 \pm 0.40) \times 10^{-4}$ | $(1.08 \pm 0.07) \times 10^{-2}$ | $(2.02 \pm 1.14) \times 10^{-4}$ |
| Olsen Ditch (M2)              | $(1.03 \pm 0.09) \times 10^{-1}$ | $(1.51 \pm 0.06) \times 10^{-3}$ | $(5.04 \pm 0.11) \times 10^{-2}$ | $(0.73 \pm 1.99) \times 10^{-4}$ |
| Wammer Ditch (M3)             | $(1.02 \pm 0.05) \times 10^{-1}$ | $(1.15 \pm 0.05) \times 10^{-3}$ | $(1.42 \pm 0.12) \times 10^{-2}$ | 0                                |
| Seven-mile Creek (M4)         | $(9.01 \pm 0.45) \times 10^{-2}$ | $(1.17 \pm 0.05) \times 10^{-3}$ | $(9.54 \pm 0.77) \times 10^{-3}$ | $(2.76 \pm 1.42) \times 10^{-4}$ |
| Kiwannis (M5)                 | $(9.80 \pm 0.39) \times 10^{-2}$ | $(1.27 \pm 0.06) \times 10^{-3}$ | $(1.25 \pm 0.17) \times 10^{-2}$ | $(2.67 \pm 1.54) \times 10^{-4}$ |
| <b><i>Yahara</i></b>          |                                  |                                  |                                  |                                  |
| North Yahara (Y1)             | $(9.04 \pm 0.39) \times 10^{-2}$ | $(8.82 \pm 0.43) \times 10^{-4}$ | $(4.49 \pm 1.24) \times 10^{-3}$ | $(4.92 \pm 1.43) \times 10^{-4}$ |
| Lake Mendota (Y2)             | $(5.03 \pm 0.39) \times 10^{-2}$ | $(5.26 \pm 0.55) \times 10^{-4}$ | $(1.80 \pm 0.49) \times 10^{-2}$ | 0                                |
| Lake Wingra (Y3)              | $(6.89 \pm 0.42) \times 10^{-2}$ | $(7.72 \pm 0.45) \times 10^{-4}$ | $(9.46 \pm 0.53) \times 10^{-3}$ | $(0.72 \pm 1.72) \times 10^{-4}$ |
| Lake Kegonsa (Y4)             | $(6.06 \pm 0.36) \times 10^{-2}$ | $(1.08 \pm 0.87) \times 10^{-3}$ | $(1.45 \pm 0.04) \times 10^{-2}$ | $(7.97 \pm 1.54) \times 10^{-4}$ |
| South Yahara (Y5)             | $(6.15 \pm 0.44) \times 10^{-2}$ | $(7.10 \pm 0.41) \times 10^{-4}$ | $(1.51 \pm 0.07) \times 10^{-2}$ | $(0.12 \pm 1.46) \times 10^{-4}$ |
| Badfish Upstream (Y6)         | $(9.64 \pm 0.51) \times 10^{-2}$ | $(9.67 \pm 0.43) \times 10^{-4}$ | $(1.98 \pm 0.17) \times 10^{-2}$ | $(2.48 \pm 1.74) \times 10^{-4}$ |
| Badfish Downstream (Y7)       | $(7.46 \pm 0.42) \times 10^{-2}$ | $(1.11 \pm 0.06) \times 10^{-3}$ | $(3.37 \pm 0.99) \times 10^{-3}$ | $(4.13 \pm 1.56) \times 10^{-4}$ |
| Confluence (Y8)               | $(6.15 \pm 0.41) \times 10^{-2}$ | $(6.26 \pm 0.54) \times 10^{-4}$ | $(1.11 \pm 0.09) \times 10^{-2}$ | 0                                |
| <b><i>St. Louis River</i></b> |                                  |                                  |                                  |                                  |
| Sand Creek (S1)               | $(2.07 \pm 0.04) \times 10^{-2}$ | $(1.39 \pm 0.06) \times 10^{-4}$ | $(1.51 \pm 0.09) \times 10^{-3}$ | $(1.91 \pm 0.50) \times 10^{-4}$ |
| Meadowlands (S2)              | $(3.79 \pm 0.09) \times 10^{-2}$ | $(3.32 \pm 0.08) \times 10^{-4}$ | $(1.47 \pm 0.11) \times 10^{-3}$ | $(1.25 \pm 0.40) \times 10^{-4}$ |
| River Inn (S3)                | $(4.26 \pm 0.10) \times 10^{-2}$ | $(3.38 \pm 0.12) \times 10^{-4}$ | $(1.48 \pm 0.14) \times 10^{-3}$ | $(1.96 \pm 0.43) \times 10^{-4}$ |
| Munger Landing (S4)           | $(4.37 \pm 0.10) \times 10^{-2}$ | $(3.53 \pm 0.12) \times 10^{-4}$ | $(1.66 \pm 0.20) \times 10^{-3}$ | $(1.10 \pm 0.47) \times 10^{-4}$ |

|                              |                                  |                                  |                                  |                                  |
|------------------------------|----------------------------------|----------------------------------|----------------------------------|----------------------------------|
| East Detroit (S5)            | $(4.07 \pm 0.13) \times 10^{-2}$ | $(3.11 \pm 0.19) \times 10^{-4}$ | $(1.76 \pm 0.12) \times 10^{-3}$ | $(1.17 \pm 0.45) \times 10^{-4}$ |
| Blatnik Bridge (S6)          | $(4.27 \pm 0.15) \times 10^{-2}$ | $(3.75 \pm 0.23) \times 10^{-4}$ | $(9.31 \pm 3.86) \times 10^{-4}$ | $(6.04 \pm 6.37) \times 10^{-5}$ |
| Wisconsin Point (S7)         | $(7.39 \pm 3.30) \times 10^{-3}$ | $(1.07 \pm 0.29) \times 10^{-4}$ | $(6.16 \pm 0.50) \times 10^{-3}$ | 0                                |
| <b><i>Twin Cities</i></b>    |                                  |                                  |                                  |                                  |
| River Front Park (T1)        | $(2.35 \pm 0.08) \times 10^{-2}$ | $(2.64 \pm 0.10) \times 10^{-4}$ | $(2.42 \pm 0.11) \times 10^{-3}$ | $(4.40 \pm 3.15) \times 10^{-5}$ |
| East River Parkway (T2)      | $(4.06 \pm 0.13) \times 10^{-2}$ | $(4.52 \pm 0.20) \times 10^{-4}$ | $(3.00 \pm 0.23) \times 10^{-3}$ | $(4.95 \pm 5.35) \times 10^{-5}$ |
| Minnesota River (T3)         | $(1.22 \pm 0.05) \times 10^{-1}$ | $(1.79 \pm 0.06) \times 10^{-3}$ | $(3.04 \pm 0.15) \times 10^{-2}$ | $(3.55 \pm 1.90) \times 10^{-4}$ |
| Metro Downstream (T4)        | $(7.56 \pm 0.28) \times 10^{-2}$ | $(9.20 \pm 0.61) \times 10^{-4}$ | $(5.71 \pm 0.35) \times 10^{-3}$ | $(1.63 \pm 1.08) \times 10^{-4}$ |
| Eagles Point Downstream (T5) | $(8.54 \pm 0.63) \times 10^{-2}$ | $(9.57 \pm 0.72) \times 10^{-4}$ | $(7.94 \pm 0.51) \times 10^{-3}$ | $(0.64 \pm 1.37) \times 10^{-4}$ |
| Lake of the Isles (T6)       | $(4.31 \pm 0.29) \times 10^{-2}$ | $(6.22 \pm 0.30) \times 10^{-4}$ | $(7.22 \pm 0.68) \times 10^{-3}$ | 0                                |
| Vadnais Lake (T7)            | $(6.21 \pm 0.31) \times 10^{-2}$ | $(7.46 \pm 0.38) \times 10^{-4}$ | $(1.44 \pm 0.04) \times 10^{-2}$ | $(0.72 \pm 1.37) \times 10^{-4}$ |
| Lake Phalen (T8)             | $(6.73 \pm 0.37) \times 10^{-2}$ | $(1.20 \pm 0.05) \times 10^{-3}$ | $(2.26 \pm 0.09) \times 10^{-2}$ | 0                                |
| <b><i>Wastewaters</i></b>    |                                  |                                  |                                  |                                  |
| WRRF Pre-C1 (W1)             | $(8.07 \pm 0.52) \times 10^{-2}$ | $(1.08 \pm 0.04) \times 10^{-3}$ | $(9.85 \pm 0.50) \times 10^{-3}$ | $(6.92 \pm 1.70) \times 10^{-4}$ |
| WRRF Reuse (W2)              | $(7.03 \pm 0.32) \times 10^{-2}$ | $(1.03 \pm 0.05) \times 10^{-3}$ | $(1.12 \pm 0.17) \times 10^{-2}$ | $(4.28 \pm 1.48) \times 10^{-4}$ |
| WRRF Post-C1 (W3)            | $(7.93 \pm 0.32) \times 10^{-2}$ | $(1.42 \pm 0.08) \times 10^{-3}$ | $(2.13 \pm 0.16) \times 10^{-2}$ | $(4.96 \pm 1.42) \times 10^{-4}$ |
| Nine Springs Pre-UV (W4)     | $(5.35 \pm 1.18) \times 10^{-2}$ | $(9.64 \pm 0.29) \times 10^{-4}$ | $(1.79 \pm 0.33) \times 10^{-3}$ | $(3.17 \pm 1.35) \times 10^{-4}$ |
| Nine Springs Post-UV (W5)    | $(5.51 \pm 0.27) \times 10^{-2}$ | $(9.14 \pm 0.37) \times 10^{-4}$ | $(2.05 \pm 0.80) \times 10^{-3}$ | $(2.99 \pm 1.27) \times 10^{-4}$ |
| WLSSD Influent (W6)          | $(4.67 \pm 0.19) \times 10^{-3}$ | $(3.84 \pm 0.27) \times 10^{-5}$ | 0                                | $(1.64 \pm 0.81) \times 10^{-5}$ |
| WLSSD Effluent (W7)          | $(1.19 \pm 0.05) \times 10^{-2}$ | $(1.28 \pm 0.06) \times 10^{-4}$ | 0                                | $(2.64 \pm 0.29) \times 10^{-4}$ |
| WLSSD Pre-C1 (W8)            | $(2.34 \pm 0.06) \times 10^{-2}$ | $(5.01 \pm 0.07) \times 10^{-4}$ | $(3.33 \pm 0.66) \times 10^{-4}$ | $(5.86 \pm 1.81) \times 10^{-5}$ |
| WLSSD Post-C1 (W9)           | $(2.84 \pm 0.06) \times 10^{-2}$ | $(6.14 \pm 0.07) \times 10^{-4}$ | $(2.24 \pm 0.83) \times 10^{-4}$ | $(6.60 \pm 2.53) \times 10^{-5}$ |
| Metro WWTP Pre-C1 (W10)      | $(5.32 \pm 0.35) \times 10^{-2}$ | $(1.10 \pm 0.05) \times 10^{-3}$ | $(1.86 \pm 0.08) \times 10^{-2}$ | $(3.96 \pm 1.19) \times 10^{-4}$ |
| Metro WWTP Post-C1 (W11)     | $(8.26 \pm 0.31) \times 10^{-2}$ | $(1.15 \pm 0.05) \times 10^{-3}$ | $(8.08 \pm 0.59) \times 10^{-3}$ | $(3.77 \pm 0.12) \times 10^{-3}$ |

|                            |                                  |                                  |   |                                  |
|----------------------------|----------------------------------|----------------------------------|---|----------------------------------|
| Eagles Point Pre-UV (W12)  | $(3.55 \pm 0.30) \times 10^{-2}$ | $(9.31 \pm 0.64) \times 10^{-4}$ | 0 | $(1.03 \pm 0.15) \times 10^{-3}$ |
| Eagles Point Post-UV (W13) | $(2.94 \pm 0.29) \times 10^{-2}$ | $(8.40 \pm 0.36) \times 10^{-4}$ | 0 | $(3.19 \pm 1.25) \times 10^{-4}$ |

## Section S7: Quenching experiments

**Table S10.** Bimolecular reaction rate constants for quenchers and  $\cdot\text{OH}$ .

| Compound    | Role                      | $k$ ( $\text{M}^{-1} \text{s}^{-1}$ ) | Reference |
|-------------|---------------------------|---------------------------------------|-----------|
| Sorbate     | $^3\text{DOM}$ quencher   | $5.8 \times 10^9$                     | 11        |
| Histidine   | $^1\text{O}_2$ quencher   | $5.7 \times 10^9$                     | 12        |
| DABCO       | $^1\text{O}_2$ quencher   | $1.3 \times 10^9$                     | 13        |
| Isopropanol | $\cdot\text{OH}$ quencher | $1.6 \times 10^9$                     | 14        |

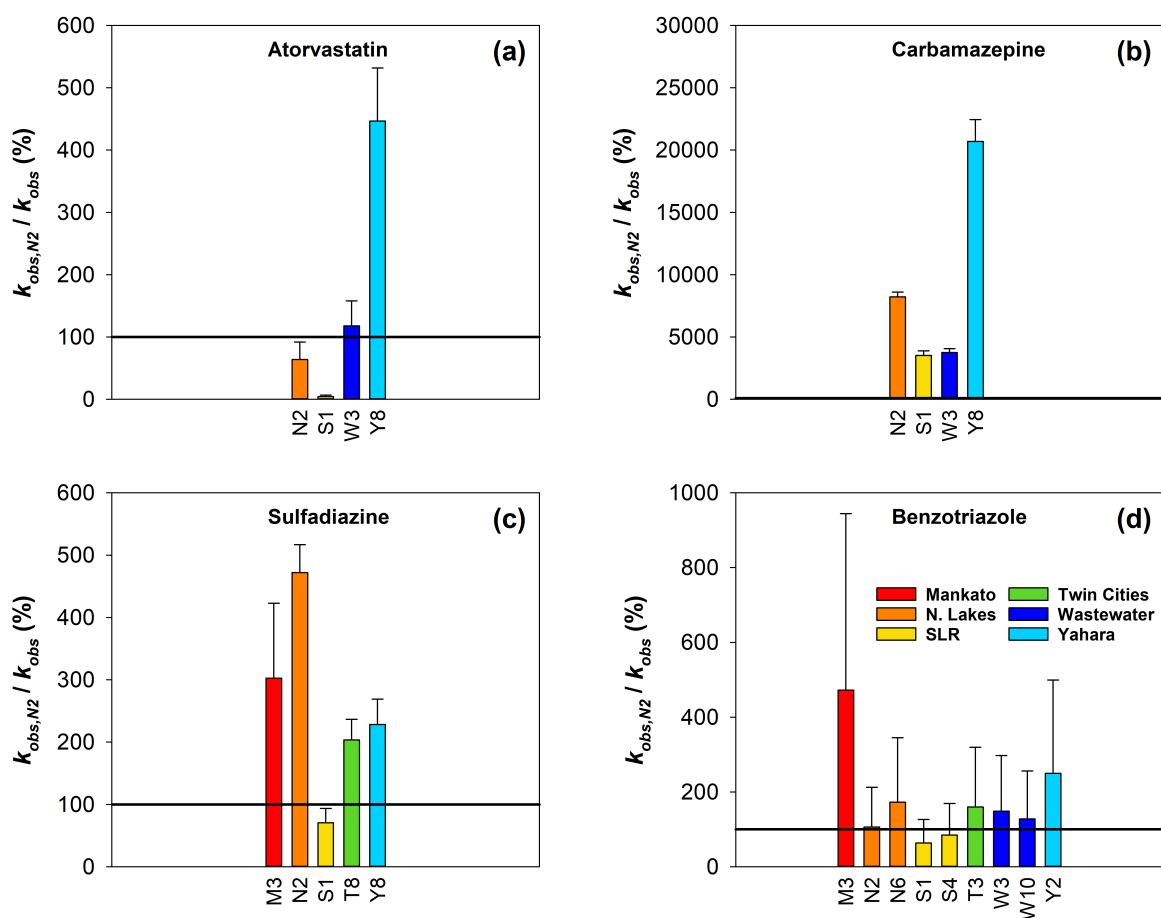

**Figure S4.** The relative change in observed rate constants in the nitrogen-sparged solutions compared to air-saturated samples for (a) atorvastatin, (b) carbamazepine, (c) sulfadiazine, and (d) benzotriazole. All rate constants are expressed as a percent of the observed rate constant in air-saturated samples. The solid horizontal line represents the unquenched rate (i.e., 100%). Error bars correspond to the standard deviation of triplicate measurements.

**Table S11.** Summary of PPRI reactivity trends determined by quencher experiments and linear regression analysis.

| Compound      | PPRI/<br>Factor             | Quencher<br>Experiments                                                          | Correlations with<br><i>k</i> <sub>indirect</sub>           | Correlations with<br><i>k</i> <sub>C</sub>                      |
|---------------|-----------------------------|----------------------------------------------------------------------------------|-------------------------------------------------------------|-----------------------------------------------------------------|
| Atorvastatin  | <sup>3</sup> DOM            | Up to 44 ± 23 % due to <sup>3</sup> DOM; modest increase with nitrogen sparging  | Positive with [ <sup>3</sup> DOM] <sub>ss</sub>             | Positive with <i>f</i> <sub>TMP</sub>                           |
|               | <sup>1</sup> O <sub>2</sub> | Up to 21 ± 22 % due to <sup>1</sup> O <sub>2</sub>                               | Positive with [ <sup>1</sup> O <sub>2</sub> ] <sub>ss</sub> | Positive with Φ <sub>1O2</sub>                                  |
|               | •OH                         | •OH is minor                                                                     | Positive with [•OH] <sub>ss</sub>                           | No trend with Φ <sub>•OH</sub>                                  |
|               | [DOC] or DOM composition    | N/A                                                                              | Positive with [DOC]                                         | Negative with H:C <sub>w</sub> , positive with DBE <sub>w</sub> |
| Carbamazepine | <sup>3</sup> DOM            | Up to 90 ± 13 % due to <sup>3</sup> DOM; large increase due to nitrogen sparging | Positive with [ <sup>3</sup> DOM] <sub>ss</sub>             | Positive with <i>f</i> <sub>TMP</sub>                           |
|               | <sup>1</sup> O <sub>2</sub> | Up to 69 ± 32 % due to <sup>1</sup> O <sub>2</sub>                               | Positive with [ <sup>1</sup> O <sub>2</sub> ] <sub>ss</sub> | Positive with Φ <sub>1O2</sub>                                  |
|               | •OH                         | •OH is minor                                                                     | Positive with [•OH] <sub>ss</sub>                           | No trend with Φ <sub>•OH</sub>                                  |
|               | [DOC] or DOM composition    | N/A                                                                              | No trend with [DOC]                                         | Positive with FI, negative with HIX                             |
| Sulfadiazine  | <sup>3</sup> DOM            | Up to 73 ± 19 % due to <sup>3</sup> DOM; modest increase with nitrogen sparging  | Positive with [ <sup>3</sup> DOM] <sub>ss</sub>             | Positive with <i>f</i> <sub>TMP</sub>                           |
|               | <sup>1</sup> O <sub>2</sub> | Up to 80 ± 20 % due to <sup>1</sup> O <sub>2</sub>                               | No trend with [ <sup>1</sup> O <sub>2</sub> ] <sub>ss</sub> | Positive with Φ <sub>1O2</sub>                                  |
|               | •OH                         | •OH is minor                                                                     | No trend with [•OH] <sub>ss</sub>                           | Negative trend with Φ <sub>•OH</sub>                            |
|               | [DOC] or DOM composition    | N/A                                                                              | No trend with [DOC]                                         | Negative with EDC, positive with E <sub>2</sub> :E <sub>3</sub> |
| Benzotriazole | <sup>3</sup> DOM            | Up to 64 ± 31 % due to <sup>3</sup> DOM; modest increase with nitrogen sparging  | Negative trend with [ <sup>3</sup> DOM] <sub>ss</sub>       | No trend with <i>f</i> <sub>TMP</sub>                           |
|               | <sup>1</sup> O <sub>2</sub> | Up to 55 ± 32 % due to <sup>1</sup> O <sub>2</sub>                               | No trend with [ <sup>1</sup> O <sub>2</sub> ] <sub>ss</sub> | Positive with Φ <sub>1O2</sub>                                  |
|               | •OH                         | Up to 65 ± 24 % due to •OH                                                       | Positive with [•OH] <sub>ss</sub>                           | Positive trend with Φ <sub>•OH</sub>                            |
|               | [DOC] or DOM composition    | N/A                                                                              | Positive with [DOC]                                         | Positive with FI                                                |

## Section S8: Linear regression analysis

Linear regression analysis was performed to correlate non-carbon normalized and carbon-normalized rate constants to aspects of water chemistry, DOM composition, and PPRI formation. Non-carbon normalized rate constants ( $k_{indirect}$ ) were correlated with [DOC], [ $^3\text{DOM}$ ]<sub>ss</sub>, [ $^1\text{O}_2$ ]<sub>ss</sub>, and [ $\bullet\text{OH}$ ]<sub>ss</sub>. Carbon-normalized rate constants ( $k_C$ ) were correlated with SUVA<sub>254</sub>, E<sub>2</sub>:E<sub>3</sub>, HIX, FI, EDC,  $f_{\text{TMP}}$ , H:C<sub>w</sub>, O:C<sub>w</sub>, DBE<sub>w</sub>,  $\Phi_{1\text{O}_2}$ , and  $\Phi_{\bullet\text{OH}}$ . All data were transformed to achieve a normal distribution of values as necessary. Variables that were transformed include  $k_{indirect, carbamazepine}$  ( $x^2$ ),  $k_{indirect, sulfadiazine}$  ( $\sqrt{x}$ ),  $k_{indirect, benzotriazine}$  ( $\log_{10}(x)$ ),  $k_{C, sulfadiazine}$  ( $\sqrt{x}$ ),  $k_{C, benzotriazine}$  ( $\log_{10}(x)$ ), E<sub>2</sub>:E<sub>3</sub> ( $\log_{10}(x)$ ), HIX ( $\log_{10}(x)$ ), FI ( $\sqrt{x}$ ), EDC ( $\log_{10}(x)$ ),  $f_{\text{TMP}}$  ( $\sqrt{x}$ ),  $\Phi_{1\text{O}_2}$  ( $\sqrt{x}$ ),  $\Phi_{\text{OH}}$  ( $\log_{10}(x)$ ), [ $^1\text{O}_2$ ]<sub>ss</sub> ( $\sqrt{x}$ ), and [ $\bullet\text{OH}$ ]<sub>ss</sub> ( $\log_{10}(x)$ ). Only correlations that were statistically significant (95% confidence interval,  $p < 0.05$ ) were included in figures.

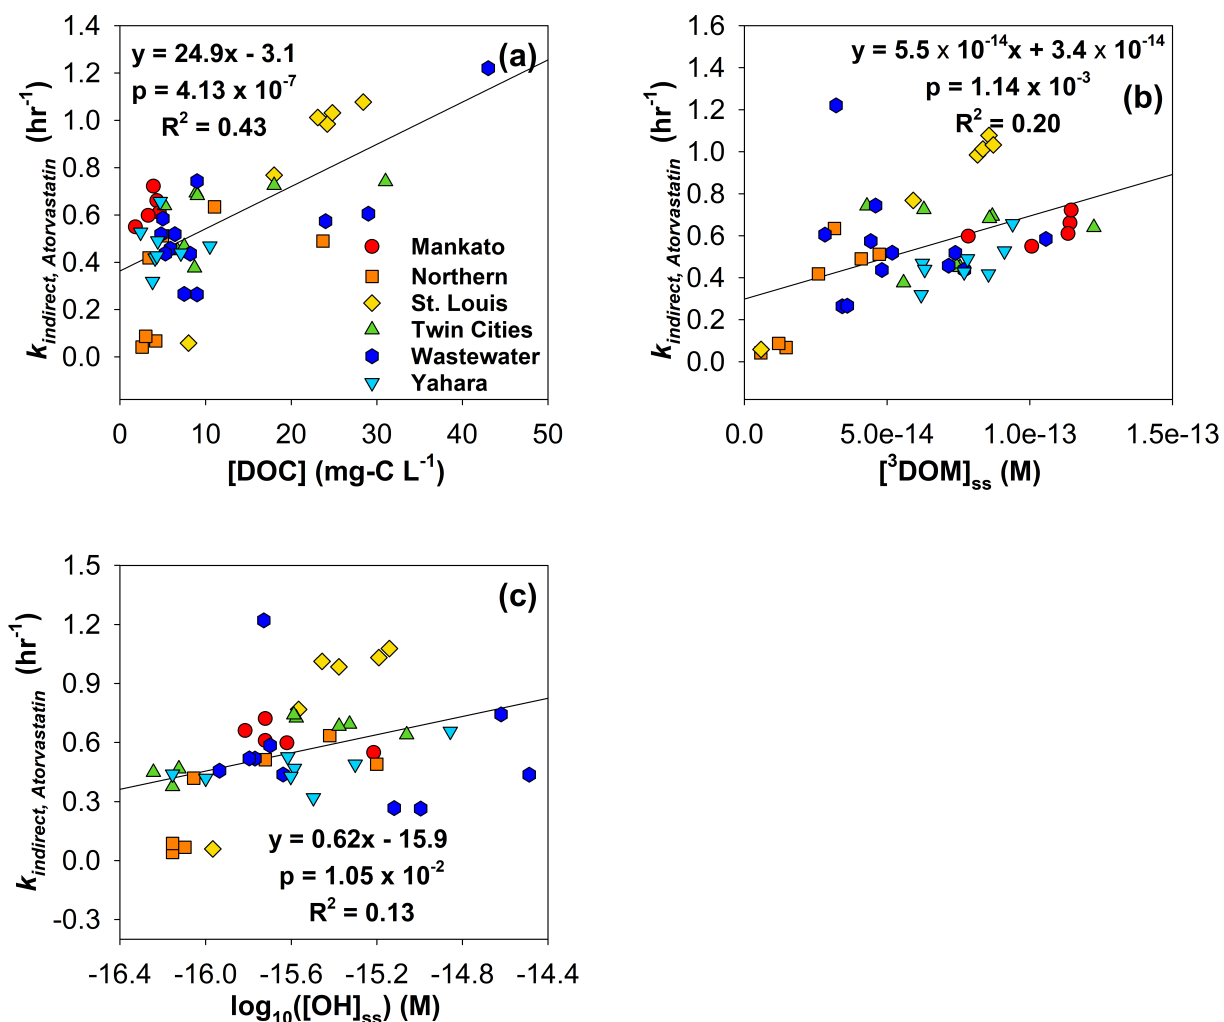

**Figure S5.** Linear regression analysis for  $k_{\text{indirect, Atorvastatin}}$  and (a) [DOC], (b) [³DOM]<sub>ss</sub>, and (c) [•OH]<sub>ss</sub>.

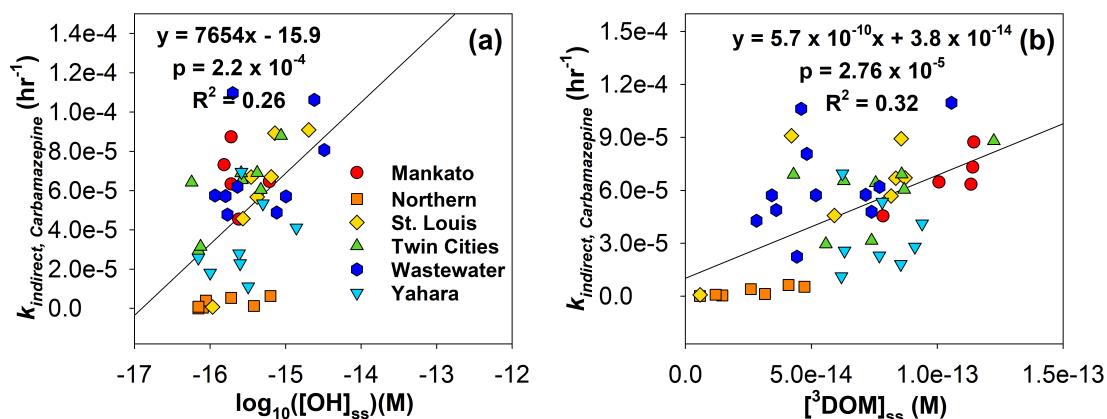

**Figure S6.** Linear regression analysis for  $k_{\text{indirect, Carbamazepine}}$  and (a) [•OH]<sub>ss</sub> and (b) [³DOM]<sub>ss</sub>.

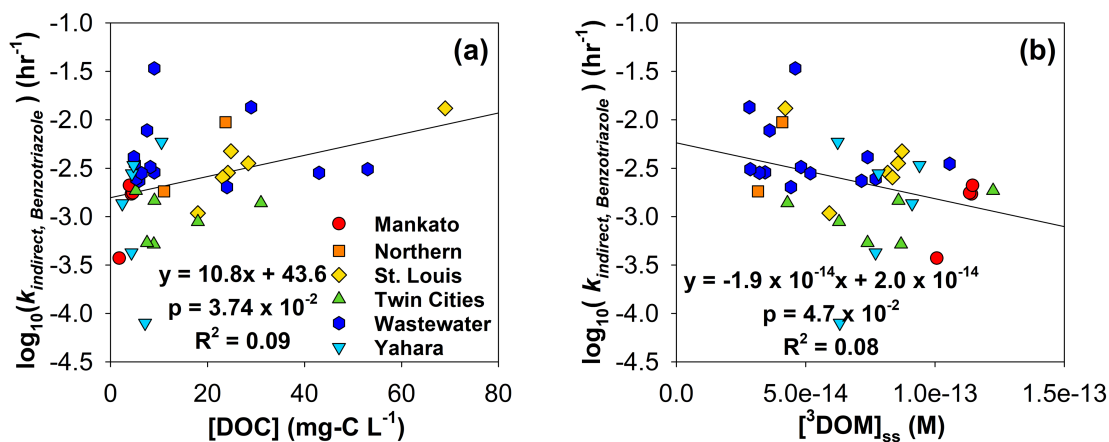

Figure S7. Linear regression analysis for  $k_{\text{indirect, Benzotriazole}}$  and (a) [DOC] and (b) [<sup>3</sup>DOM]<sub>ss</sub>.

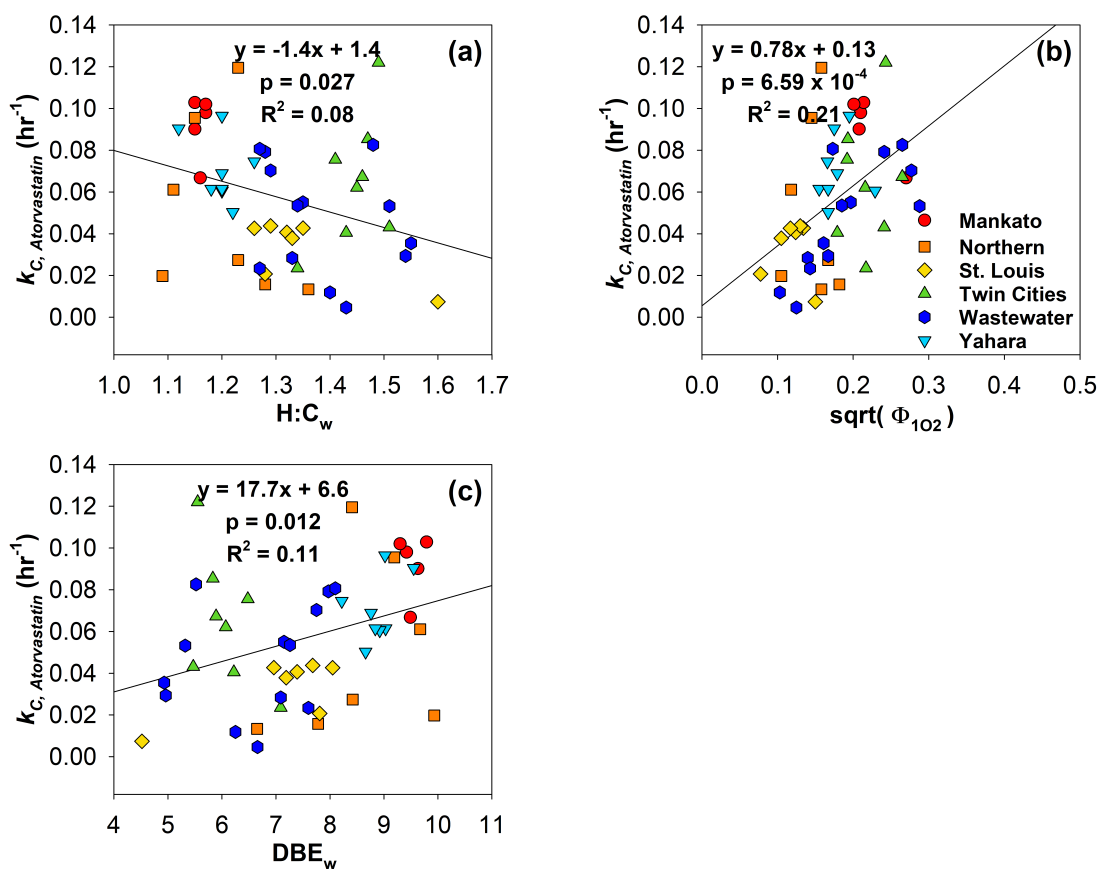

Figure S8. Linear regression analysis for  $k_{\text{C, Atorvastatin}}$  and (a) H:C<sub>w</sub>, (b)  $\Phi_{102}$ , and (c) DBE<sub>w</sub>.

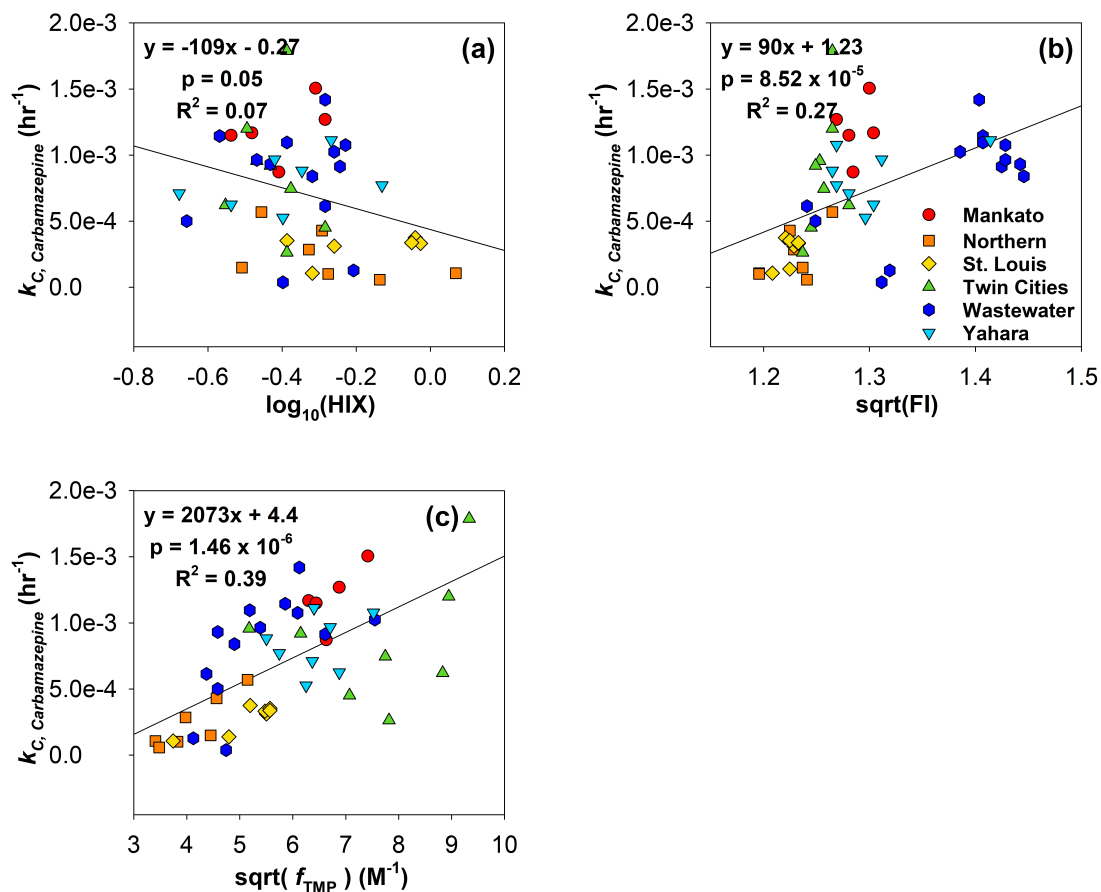

**Figure S9.** Linear regression analysis for  $k_{C, \text{Carbamazepine}}$  and (a) HIX, (b) FI, and (c)  $f_{\text{TMP}}$ .

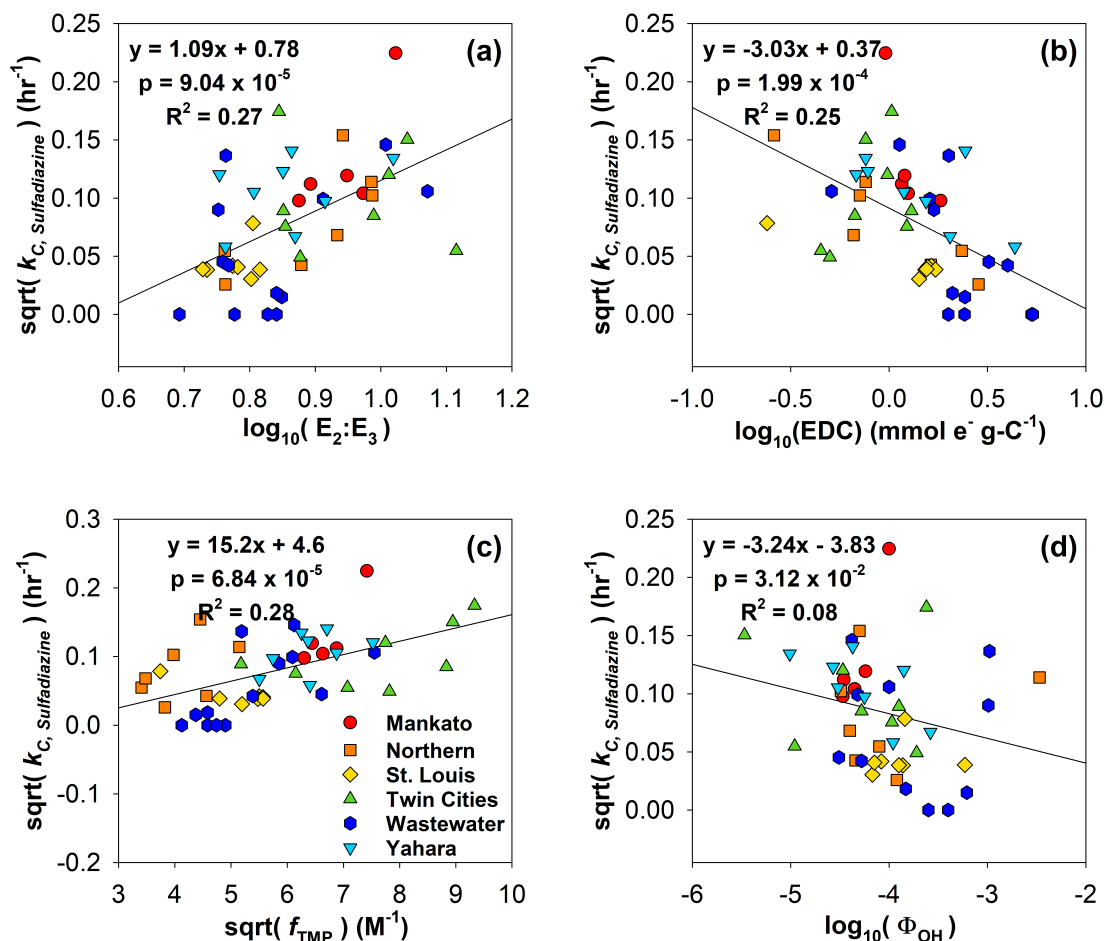

**Figure S10.** Linear regression analysis for  $k_{C, \text{Sulfadiazine}}$  and (a)  $E_2:E_3$ , (b) EDC, (c)  $f_{\text{TMP}}$  and (d)  $\Phi_{\text{OH}}$ .

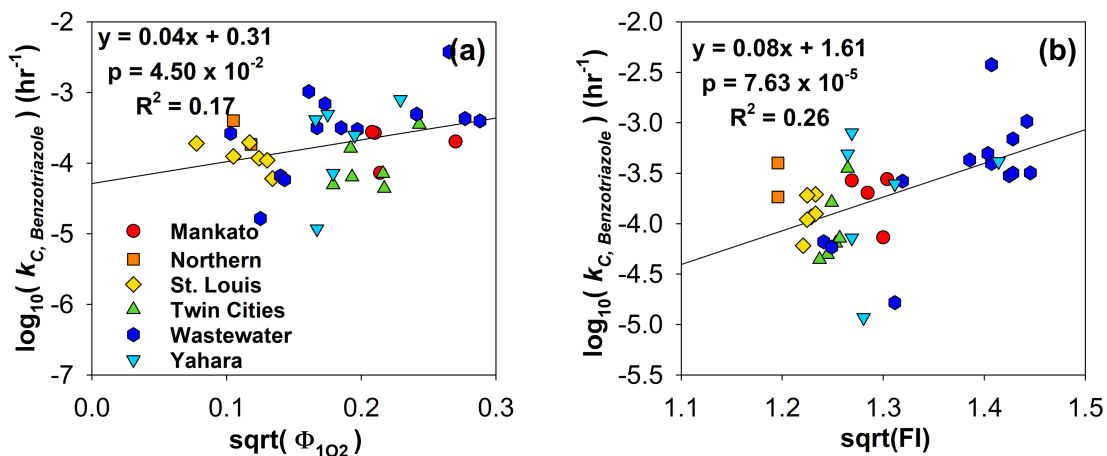

**Figure S11.** Linear regression analysis for  $k_{C, \text{Benzotriazole}}$  and (a)  $\Phi_{102}$  and (b) fluorescence index.

## Section S9: References

- (1) Wang, D.; Bolton, J. R.; Hofmann, R. Medium pressure UV Combined with chlorine advanced oxidation for trichloroethylene destruction in a model water. *Water Res.* **2012**, *46* (15), 4677–4686.
- (2) Berg, S. M.; Wammer, K. H.; Remucal, C. K. Dissolved organic matter photoreactivity is determined by its optical properties, redox activity, and molecular composition. *Environ. Sci. Technol.* **2023** *57* (16), 6703–6711.
- (3) Maizel, A. C.; Remucal, C. K. The effect of probe choice and solution conditions on the apparent photoreactivity of dissolved organic matter. *Environ. Sci. Process. Impacts* **2017**, *19* (8), 1040–1050.
- (4) Maizel, A. C.; Remucal, C. K. Molecular composition and photochemical reactivity of size-fractionated dissolved organic matter. *Environ. Sci. Technol.* **2017**, *51* (4), 2113–2123.
- (5) Appiani, E.; Ossola, R.; E. Latch, D.; R. Erickson, P.; McNeill, K. Aqueous singlet oxygen reaction kinetics of furfuryl alcohol: Effect of temperature, pH, and salt content. *Environ. Sci. Process. Impacts* **2017**, *19* (4), 507–516.
- (6) Page, S. E.; Arnold, W. A.; McNeill, K. Terephthalate as a probe for photochemically generated hydroxyl radical. *J. Environ. Monit.* **2010**, *12* (9), 1658–1665.
- (7) Laszakovits, J. R.; Berg, S. M.; Anderson, B. G.; O'Brien, J. E.; Wammer, K. H.; Sharpless, C. M. *p*-Nitroanisole/pyridine and *p*-nitroacetophenone/pyridine actinometers revisited: Quantum yield in comparison to ferrioxalate. *Environ. Sci. Technol. Lett.* **2017**, *4* (1), 11–14.
- (8) Maizel, A. C.; Li, J.; Remucal, C. K. Relationships between dissolved organic matter composition and photochemistry in lakes of diverse trophic status. *Environ. Sci. Technol.* **2017**, *51* (17), 9624–9632.
- (9) Jasper, J. T.; Sedlak, D. L. Phototransformation of wastewater-derived trace organic contaminants in open-water unit process treatment wetlands. *Environ. Sci. Technol.* **2013**, *47* (19), 10781–10790.
- (10) Westerhoff, P.; Mezyk, S. P.; Cooper, W. J.; Minakata, D. Electron pulse radiolysis determination of hydroxyl radical rate constants with Suwannee River fulvic acid and other dissolved organic matter isolates. *Environ. Sci. Technol.* **2007**, *41* (13), 4640–4646.
- (11) Buxton, G. V.; Greenstock, C. L.; Helman, W. P.; Ross, A. B. Critical review of rate constants for reactions of hydrated electrons, hydrogen atoms and hydroxyl radicals ( $\text{OH}^\bullet/\text{O}^\bullet$ ) in aqueous solution. *J. Phys. Chem. Ref. Data* **1988**, *17* (2), 513–886.
- (12) Aruoma, O. I.; Laughton, M. J.; Halliwell, B. Carnosine, homocarnosine and anserine: Could they act as antioxidants in vivo? *Biochem. J.* **1989**, *264* (3), 863–869.
- (13) Anderson, R. F.; Patel, K. B. The effect of 1,4-diazabicyclo[2.2.2]octane on the radiosensitivity of bacteria. *Photochem. Photobiol.* **1978**, *28* (4–5), 881–885.
- (14) Motohashi, N.; Saito, Y. Competitive measurement of rate constants for hydroxyl radical reactions using radiolytic hydroxylation of benzoate. *Chem. Pharm. Bull.* **1993**, *41* (10), 1842–1845.
